# Supplementary material for: Changes in Hop (Humulus lupulus L.) Oil Content and Composition during Long-Term Storage under Different Conditions
Source: MDPI journal article supplement (doi:10.3390/foods11193089), 2022-10-05
Supplement: s1 [file s1]

Supplementary Table S1. Changes in alpha-pinene content in all varieties for all storage conditions.

| Variety/form                    | time [months]<br>conditions | 0                                | 1    | 2    | 3    | 4    | 5    | 6    | 7    | 8    | 9    | 10   | 11   | 12   | 14   | 16   | 18   | 20   | 22   | 24   |
|---------------------------------|-----------------------------|----------------------------------|------|------|------|------|------|------|------|------|------|------|------|------|------|------|------|------|------|------|
|                                 |                             | Content of alpha-pinene [rel. %] |      |      |      |      |      |      |      |      |      |      |      |      |      |      |      |      |      |      |
| Celeia<br>cones                 | anaerobic, cold room        | 0,08                             | 0,08 | 0,09 | 0,10 | 0,10 | 0,10 | 0,09 | 0,10 | 0,11 | 0,11 | 0,11 | 0,12 | 0,12 | 0,12 | 0,12 | 0,11 | 0,12 | 0,12 | 0,14 |
|                                 | anaerobic, room temperature | 0,08                             | 0,09 | 0,08 | 0,10 | 0,10 | 0,11 | 0,11 | 0,13 | 0,13 | 0,17 | 0,20 | 0,19 | 0,20 | 0,20 | 0,20 | 0,16 | 0,26 | 0,35 | 0,39 |
|                                 | aerobic, cold room          | 0,08                             | 0,08 | 0,08 | 0,09 | 0,11 | 0,11 | 0,10 | 0,11 | 0,12 | 0,11 | 0,12 | 0,12 | 0,12 | 0,13 | 0,15 | 0,15 | 0,16 | 0,19 | 0,23 |
|                                 | aerobic, room temperature   | 0,08                             | 0,08 | 0,08 | 0,10 | 0,12 | 0,13 | 0,14 | 0,16 | 0,22 | 0,26 | 0,31 | 0,40 | 0,41 | 0,42 | 0,42 | 0,43 | 0,44 | 0,46 | 0,62 |
| Celeia<br>pellets               | anaerobic, cold room        | 0,05                             | 0,06 | 0,06 | 0,06 | 0,06 | 0,06 | 0,06 | 0,07 | 0,06 | 0,06 | 0,06 | 0,06 | 0,06 | 0,06 | 0,07 | 0,06 | 0,06 | 0,07 | 0,07 |
|                                 | anaerobic, room temperature | 0,05                             | 0,05 | 0,06 | 0,06 | 0,07 | 0,07 | 0,07 | 0,07 | 0,07 | 0,08 | 0,08 | 0,09 | 0,09 | 0,10 | 0,09 | 0,09 | 0,08 | 0,09 | 0,10 |
|                                 | aerobic, cold room          | 0,05                             | 0,02 | 0,02 | 0,02 | 0,02 | 0,02 | 0,01 | 0,02 | 0,02 | 0,01 | 0,01 | 0,01 | 0,01 | 0,01 | 0,01 | 0,01 | 0,01 | 0,01 | 0,01 |
|                                 | aerobic, room temperature   | 0,05                             | 0,02 | 0,01 | 0,01 | 0,01 | 0,00 | 0,00 | 0,00 | 0,00 | 0,00 | 0,00 | 0,00 | 0,01 | 0,01 | 0,00 | 0,01 | 0,00 | 0,01 | 0,01 |
| Aurora<br>cones                 | anaerobic, cold room        | 0,08                             | 0,09 | 0,09 | 0,09 | 0,09 | 0,09 | 0,09 | 0,11 | 0,08 | 0,09 | 0,09 | 0,09 | 0,10 | 0,11 | 0,12 | 0,11 | 0,11 | 0,13 | 0,12 |
|                                 | anaerobic, room temperature | 0,08                             | 0,10 | 0,10 | 0,09 | 0,10 | 0,10 | 0,10 | 0,08 | 0,11 | 0,13 | 0,14 | 0,15 | 0,17 | 0,17 | 0,17 | 0,17 | 0,22 | 0,29 | 0,29 |
|                                 | aerobic, cold room          | 0,08                             | 0,11 | 0,09 | 0,09 | 0,09 | 0,09 | 0,10 | 0,09 | 0,09 | 0,09 | 0,11 | 0,11 | 0,11 | 0,12 | 0,15 | 0,13 | 0,12 | 0,14 | 0,16 |
|                                 | aerobic, room temperature   | 0,08                             | 0,11 | 0,09 | 0,10 | 0,10 | 0,11 | 0,12 | 0,14 | 0,19 | 0,35 | 0,45 | 0,40 | 0,46 | 0,58 | 0,60 | 0,55 | 0,62 | 0,77 | 0,79 |
| Aurora<br>pellets               | anaerobic, cold room        | 0,08                             | 0,09 | 0,10 | 0,10 | 0,10 | 0,12 | 0,10 | 0,10 | 0,10 | 0,10 | 0,10 | 0,11 | 0,11 | 0,12 | 0,11 | 0,13 | 0,12 | 0,13 | 0,14 |
|                                 | anaerobic, room temperature | 0,08                             | 0,09 | 0,10 | 0,11 | 0,11 | 0,13 | 0,11 | 0,14 | 0,15 | 0,16 | 0,17 | 0,19 | 0,20 | 0,20 | 0,21 | 0,20 | 0,22 | 0,24 | 0,26 |
|                                 | aerobic, cold room          | 0,08                             | 0,07 | 0,05 | 0,04 | 0,04 | 0,03 | 0,04 | 0,03 | 0,03 | 0,02 | 0,02 | 0,02 | 0,02 | 0,02 | 0,01 | 0,03 | 0,02 | 0,02 | 0,02 |
|                                 | aerobic, room temperature   | 0,08                             | 0,05 | 0,02 | 0,03 | 0,01 | 0,00 | 0,01 | 0,00 | 0,01 | 0,01 | 0,01 | 0,01 | 0,01 | 0,02 | 0,02 | 0,02 | 0,01 | 0,02 | 0,02 |
| Bobek<br>cones                  | anaerobic, cold room        | 0,10                             | 0,10 | 0,11 | 0,11 | 0,12 | 0,11 | 0,12 | 0,11 | 0,12 | 0,13 | 0,14 | 0,13 | 0,13 | 0,14 | 0,15 | 0,16 | 0,16 | 0,18 | 0,16 |
|                                 | anaerobic, room temperature | 0,10                             | 0,10 | 0,11 | 0,11 | 0,12 | 0,12 | 0,13 | 0,13 | 0,13 | 0,15 | 0,25 | 0,24 | 0,23 | 0,28 | 0,30 | 0,31 | 0,37 | 0,46 | 0,51 |
|                                 | aerobic, cold room          | 0,10                             | 0,10 | 0,11 | 0,12 | 0,12 | 0,15 | 0,14 | 0,13 | 0,11 | 0,12 | 0,18 | 0,19 | 0,20 | 0,21 | 0,26 | 0,24 | 0,27 | 0,31 | 0,31 |
|                                 | aerobic, room temperature   | 0,10                             | 0,10 | 0,10 | 0,11 | 0,13 | 0,18 | 0,20 | 0,26 | 0,40 | 0,53 | 0,74 | 0,76 | 0,81 | 0,84 | 0,84 | 0,83 | 0,83 | 0,97 | 1,03 |
| Bobek<br>pellets                | anaerobic, cold room        | 0,07                             | 0,08 | 0,09 | 0,08 | 0,08 | 0,09 | 0,08 | 0,08 | 0,08 | 0,09 | 0,08 | 0,09 | 0,08 | 0,09 | 0,09 | 0,09 | 0,09 | 0,09 | 0,09 |
|                                 | anaerobic, room temperature | 0,07                             | 0,08 | 0,08 | 0,09 | 0,09 | 0,09 | 0,10 | 0,10 | 0,11 | 0,13 | 0,12 | 0,14 | 0,13 | 0,13 | 0,13 | 0,14 | 0,14 | 0,17 | 0,19 |
|                                 | aerobic, cold room          | 0,07                             | 0,06 | 0,05 | 0,05 | 0,04 | 0,04 | 0,03 | 0,02 | 0,02 | 0,01 | 0,02 | 0,02 | 0,02 | 0,02 | 0,01 | 0,01 | 0,01 | 0,02 | 0,02 |
|                                 | aerobic, room temperature   | 0,07                             | 0,05 | 0,03 | 0,02 | 0,02 | 0,01 | 0,01 | 0,01 | 0,01 | 0,02 | 0,02 | 0,02 | 0,03 | 0,03 | 0,03 | 0,03 | 0,02 | 0,04 | 0,03 |
| Styrian Gold<br>cones           | anaerobic, cold room        | 0,08                             | 0,09 | 0,08 | 0,09 | 0,08 | 0,09 | 0,08 | 0,08 | 0,07 | 0,09 | 0,09 | 0,09 | 0,08 | 0,07 | 0,08 | 0,10 | 0,10 | 0,11 | 0,10 |
|                                 | anaerobic, room temperature | 0,08                             | 0,08 | 0,08 | 0,09 | 0,08 | 0,10 | 0,10 | 0,11 | 0,13 | 0,14 | 0,19 | 0,13 | 0,14 | 0,21 | 0,15 | 0,18 | 0,21 | 0,24 | 0,34 |
|                                 | aerobic, cold room          | 0,08                             | 0,07 | 0,07 | 0,09 | 0,08 | 0,09 | 0,08 | 0,08 | 0,07 | 0,08 | 0,10 | 0,09 | 0,09 | 0,13 | 0,11 | 0,11 | 0,12 | 0,13 | 0,15 |
|                                 | aerobic, room temperature   | 0,08                             | 0,08 | 0,08 | 0,08 | 0,09 | 0,10 | 0,12 | 0,19 | 0,28 | 0,27 | 0,28 | 0,29 | 0,28 | 0,27 | 0,27 | 0,31 | 0,46 | 0,55 | 0,48 |
| Savinjski<br>golding<br>pellets | anaerobic, cold room        | 0,05                             | 0,05 | 0,05 | 0,06 | 0,06 | 0,06 | 0,06 | 0,06 | 0,06 | 0,06 | 0,05 | 0,05 | 0,06 | 0,06 | 0,05 | 0,05 | 0,05 | 0,05 | 0,07 |
|                                 | anaerobic, room temperature | 0,05                             | 0,05 | 0,05 | 0,06 | 0,06 | 0,06 | 0,07 | 0,07 | 0,07 | 0,07 | 0,08 | 0,07 | 0,09 | 0,08 | 0,09 | 0,08 | 0,08 | 0,08 | 0,11 |
|                                 | aerobic, cold room          | 0,05                             | 0,05 | 0,02 | 0,02 | 0,02 | 0,00 | 0,02 | 0,01 | 0,01 | 0,01 | 0,01 | 0,01 | 0,01 | 0,01 | 0,00 | 0,01 | 0,00 | 0,01 | 0,01 |
|                                 | aerobic, room temperature   | 0,05                             | 0,01 | 0,01 | 0,01 | 0,00 | 0,00 | 0,00 | 0,00 | 0,00 | 0,00 | 0,00 | 0,00 | 0,00 | 0,00 | 0,01 | 0,01 | 0,01 | 0,00 | 0,00 |
| Styrian Wolf<br>cones           | anaerobic, cold room        | 0,11                             | 0,11 | 0,12 | 0,10 | 0,11 | 0,11 | 0,11 | 0,12 | 0,13 | 0,13 | 0,13 | 0,12 | 0,12 | 0,14 | 0,14 | 0,14 | 0,16 | 0,14 | 0,16 |
|                                 | anaerobic, room temperature | 0,11                             | 0,22 | 0,13 | 0,13 | 0,14 | 0,12 | 0,02 | 0,17 | 0,19 | 0,24 | 0,33 | 0,27 | 0,30 | 0,30 | 0,33 | 0,29 | 0,43 | 0,47 | 0,55 |
|                                 | aerobic, cold room          | 0,11                             | 0,12 | 0,12 | 0,13 | 0,13 | 0,15 | 0,15 | 0,16 | 0,16 | 0,17 | 0,18 | 0,22 | 0,20 | 0,25 | 0,26 | 0,29 | 0,36 | 0,34 | 0,43 |
|                                 | aerobic, room temperature   | 0,11                             | 0,14 | 0,15 | 0,15 | 0,19 | 0,29 | 0,26 | 0,37 | 0,45 | 0,66 | 0,78 | 0,83 | 0,88 | 1,04 | 0,89 | 0,95 | 0,94 | 0,92 | 0,96 |
| Strian Wolf<br>pellets          | anaerobic, cold room        | 0,10                             | 0,10 | 0,10 | 0,11 | 0,10 | 0,10 | 0,11 | 0,11 | 0,10 | 0,12 | 0,11 | 0,12 | 0,13 | 0,13 | 0,12 | 0,13 | 0,14 | 0,15 | 0,15 |
|                                 | anaerobic, room temperature | 0,10                             | 0,12 | 0,13 | 0,13 | 0,16 | 0,14 | 0,15 | 0,16 | 0,18 | 0,18 | 0,20 | 0,21 | 0,21 | 0,22 | 0,22 | 0,22 | 0,25 | 0,29 | 0,28 |
|                                 | aerobic, cold room          | 0,10                             | 0,09 | 0,07 | 0,06 | 0,04 | 0,05 | 0,04 | 0,05 | 0,03 | 0,03 | 0,03 | 0,04 | 0,05 | 0,05 | 0,03 | 0,02 | 0,03 | 0,03 | 0,03 |
|                                 | aerobic, room temperature   | 0,10                             | 0,05 | 0,02 | 0,01 | 0,01 | 0,02 | 0,02 | 0,03 | 0,01 | 0,03 | 0,03 | 0,03 | 0,04 | 0,04 | 0,03 | 0,03 | 0,03 | 0,04 | 0,05 |

Supplementary Table S2. Changes in myrcene content in all varieties for all storage conditions.

| Variety/form              | time [months]               | 0                           | 1     | 2     | 3     | 4     | 5     | 6     | 7     | 8     | 9     | 10    | 11    | 12    | 14    | 16    | 18    | 20    | 22    | 24    |
|---------------------------|-----------------------------|-----------------------------|-------|-------|-------|-------|-------|-------|-------|-------|-------|-------|-------|-------|-------|-------|-------|-------|-------|-------|
|                           | conditions                  | Content of myrcene [rel. %] |       |       |       |       |       |       |       |       |       |       |       |       |       |       |       |       |       |       |
| Celeia cones              | anaerobic, cold room        | 48,44                       | 47,44 | 49,29 | 46,69 | 45,95 | 45,45 | 41,40 | 44,39 | 41,10 | 40,43 | 42,01 | 39,88 | 41,01 | 39,80 | 36,42 | 34,48 | 34,73 | 34,75 | 36,09 |
|                           | anaerobic, room temperature | 48,44                       | 45,73 | 46,78 | 44,47 | 43,12 | 41,18 | 38,16 | 37,76 | 35,64 | 33,36 | 32,00 | 31,25 | 30,03 | 27,88 | 26,43 | 20,86 | 11,11 | 11,48 | 12,78 |
|                           | aerobic, cold room          | 48,44                       | 44,76 | 44,25 | 43,92 | 41,45 | 43,45 | 38,74 | 40,65 | 38,65 | 34,88 | 34,56 | 36,53 | 34,42 | 33,38 | 31,55 | 26,09 | 18,50 | 22,22 | 20,74 |
|                           | aerobic, room temperature   | 48,44                       | 42,54 | 38,28 | 37,10 | 36,39 | 35,17 | 28,24 | 24,67 | 18,78 | 11,35 | 5,63  | 4,16  | 3,99  | 3,00  | 2,98  | 2,41  | 1,79  | 1,51  | 2,14  |
| Celeia pellets            | anaerobic, cold room        | 39,13                       | 38,40 | 38,19 | 37,79 | 37,04 | 36,47 | 34,68 | 34,60 | 34,50 | 34,70 | 34,95 | 34,80 | 34,31 | 29,42 | 28,40 | 27,39 | 28,12 | 27,55 | 30,32 |
|                           | anaerobic, room temperature | 39,13                       | 38,08 | 37,08 | 35,74 | 37,26 | 36,08 | 32,35 | 33,07 | 31,21 | 29,77 | 24,37 | 25,00 | 25,11 | 20,37 | 19,78 | 18,06 | 13,46 | 15,08 | 8,72  |
|                           | aerobic, cold room          | 39,13                       | 19,93 | 9,65  | 6,32  | 2,11  | 6,17  | 3,28  | 5,87  | 4,70  | 3,65  | 2,94  | 3,34  | 4,27  | 3,22  | 2,14  | 1,73  | 1,64  | 1,52  | 1,85  |
|                           | aerobic, room temperature   | 39,13                       | 13,85 | 5,98  | 2,90  | 4,42  | 1,46  | 1,28  | 0,94  | 0,94  | 0,53  | 0,39  | 0,91  | 1,37  | 0,73  | 0,52  | 0,50  | 0,33  | 0,23  | 0,09  |
| Aurora cones              | anaerobic, cold room        | 57,54                       | 58,11 | 57,70 | 57,71 | 56,00 | 55,56 | 57,73 | 52,73 | 52,38 | 53,86 | 54,13 | 56,03 | 53,15 | 52,18 | 55,86 | 50,64 | 50,43 | 53,41 | 54,71 |
|                           | anaerobic, room temperature | 57,54                       | 57,87 | 57,20 | 57,73 | 56,69 | 55,09 | 56,67 | 55,95 | 48,74 | 49,26 | 45,02 | 46,99 | 51,05 | 48,90 | 44,78 | 45,01 | 36,28 | 30,88 | 29,52 |
|                           | aerobic, cold room          | 57,54                       | 52,92 | 53,02 | 53,47 | 52,28 | 51,15 | 52,36 | 49,63 | 49,44 | 45,34 | 50,74 | 49,49 | 52,42 | 48,70 | 45,72 | 43,24 | 38,15 | 38,24 | 36,67 |
|                           | aerobic, room temperature   | 57,54                       | 51,93 | 50,47 | 52,02 | 48,88 | 48,44 | 46,94 | 38,51 | 27,44 | 17,01 | 10,14 | 6,88  | 8,35  | 6,41  | 4,87  | 2,96  | 1,78  | 1,52  | 1,49  |
| Aurora pellets            | anaerobic, cold room        | 53,44                       | 51,80 | 51,99 | 52,20 | 51,01 | 48,58 | 52,20 | 51,33 | 49,39 | 49,15 | 47,97 | 50,53 | 48,64 | 47,51 | 42,16 | 43,02 | 43,02 | 48,44 | 47,80 |
|                           | anaerobic, room temperature | 53,44                       | 51,38 | 52,50 | 53,01 | 52,75 | 50,69 | 50,66 | 50,07 | 48,24 | 46,15 | 43,89 | 47,25 | 49,17 | 45,57 | 43,53 | 42,90 | 37,57 | 37,79 | 35,83 |
|                           | aerobic, cold room          | 53,44                       | 39,82 | 22,03 | 12,77 | 13,07 | 6,61  | 10,11 | 7,62  | 7,59  | 4,17  | 3,97  | 5,44  | 4,90  | 3,19  | 2,23  | 2,21  | 1,89  | 1,97  | 4,96  |
|                           | aerobic, room temperature   | 53,44                       | 30,14 | 7,55  | 4,68  | 2,91  | 1,67  | 1,74  | 1,46  | 1,02  | 0,78  | 1,58  | 1,95  | 1,25  | 0,70  | 0,54  | 0,49  | 0,57  | 0,17  | 0,16  |
| Bobek cones               | anaerobic, cold room        | 68,36                       | 66,26 | 63,69 | 65,45 | 63,53 | 62,84 | 61,45 | 60,59 | 60,15 | 60,22 | 60,31 | 61,97 | 60,27 | 62,31 | 56,32 | 57,47 | 51,50 | 51,59 | 57,26 |
|                           | anaerobic, room temperature | 68,36                       | 66,16 | 64,04 | 63,51 | 63,54 | 61,12 | 63,01 | 57,29 | 51,12 | 46,15 | 45,09 | 56,59 | 54,16 | 51,96 | 48,78 | 46,26 | 34,35 | 29,09 | 28,64 |
|                           | aerobic, cold room          | 68,36                       | 60,10 | 61,24 | 61,87 | 55,90 | 55,96 | 57,52 | 52,30 | 49,55 | 47,12 | 51,55 | 54,36 | 52,30 | 51,31 | 48,45 | 40,26 | 38,09 | 28,08 | 30,93 |
|                           | aerobic, room temperature   | 68,36                       | 64,91 | 60,98 | 61,79 | 55,65 | 52,75 | 49,57 | 36,18 | 22,15 | 13,09 | 11,10 | 11,60 | 10,39 | 10,49 | 9,00  | 5,30  | 4,54  | 4,22  | 4,08  |
| Bobek pellets             | anaerobic, cold room        | 56,95                       | 56,83 | 56,12 | 57,73 | 57,37 | 59,10 | 56,80 | 56,19 | 56,64 | 56,61 | 56,46 | 55,58 | 55,26 | 55,54 | 53,02 | 47,91 | 51,38 | 51,01 | 54,31 |
|                           | anaerobic, room temperature | 56,95                       | 58,22 | 59,76 | 58,90 | 56,89 | 58,75 | 57,09 | 54,79 | 53,61 | 53,07 | 51,63 | 52,71 | 51,98 | 51,11 | 52,84 | 51,43 | 49,71 | 47,02 | 39,56 |
|                           | aerobic, cold room          | 56,95                       | 32,96 | 22,84 | 23,28 | 10,25 | 13,42 | 8,28  | 6,62  | 4,58  | 4,48  | 5,64  | 4,72  | 3,65  | 2,91  | 2,19  | 2,00  | 1,78  | 2,38  | 2,16  |
|                           | aerobic, room temperature   | 56,95                       | 25,00 | 20,69 | 11,22 | 1,94  | 2,83  | 1,46  | 1,02  | 0,66  | 1,27  | 0,72  | 0,55  | 0,45  | 0,43  | 0,34  | 0,33  | 0,23  | 0,88  | 0,61  |
| Styrian Gold cones        | anaerobic, cold room        | 46,70                       | 43,37 | 43,57 | 46,67 | 44,33 | 44,72 | 40,60 | 39,10 | 38,06 | 37,63 | 37,50 | 37,16 | 25,91 | 29,30 | 29,88 | 32,85 | 30,86 | 34,56 | 36,23 |
|                           | anaerobic, room temperature | 46,70                       | 40,53 | 42,53 | 44,58 | 42,70 | 43,14 | 37,38 | 37,92 | 32,37 | 29,48 | 23,87 | 20,19 | 15,46 | 26,98 | 29,48 | 18,29 | 18,14 | 15,39 | 16,97 |
|                           | aerobic, cold room          | 46,70                       | 39,54 | 39,43 | 44,24 | 41,54 | 43,71 | 37,41 | 39,11 | 34,15 | 34,10 | 34,14 | 30,12 | 23,06 | 31,69 | 27,17 | 22,94 | 23,79 | 19,92 | 27,70 |
|                           | aerobic, room temperature   | 46,70                       | 38,89 | 40,55 | 40,73 | 40,94 | 37,59 | 30,59 | 27,62 | 17,45 | 9,52  | 7,53  | 5,87  | 3,97  | 5,33  | 3,80  | 3,27  | 2,28  | 2,24  | 1,36  |
| Savinjski golding pellets | anaerobic, cold room        | 32,03                       | 33,90 | 32,93 | 34,27 | 33,53 | 32,61 | 34,45 | 30,46 | 31,46 | 30,17 | 25,37 | 24,24 | 26,45 | 26,25 | 24,10 | 24,63 | 20,39 | 19,30 | 26,07 |
|                           | anaerobic, room temperature | 32,03                       | 31,44 | 32,56 | 32,60 | 31,12 | 30,53 | 31,55 | 28,11 | 26,57 | 22,57 | 18,22 | 19,73 | 21,16 | 19,54 | 17,31 | 16,69 | 12,85 | 8,78  | 9,97  |
|                           | aerobic, cold room          | 32,03                       | 33,77 | 12,97 | 7,69  | 5,35  | 2,31  | 5,92  | 4,82  | 3,77  | 3,27  | 2,76  | 3,99  | 3,92  | 2,24  | 1,64  | 1,88  | 1,36  | 1,34  | 1,75  |
|                           | aerobic, room temperature   | 32,03                       | 5,32  | 4,84  | 2,84  | 1,72  | 1,31  | 1,42  | 1,12  | 0,78  | 0,58  | 1,63  | 1,30  | 0,86  | 0,75  | 0,63  | 0,47  | 0,38  | 0,55  | 0,04  |
| Styrian Wolf cones        | anaerobic, cold room        | 60,78                       | 60,38 | 56,78 | 56,20 | 57,49 | 58,26 | 57,75 | 55,85 | 56,70 | 57,46 | 56,45 | 48,70 | 55,33 | 54,06 | 49,18 | 48,77 | 43,96 | 42,70 | 38,35 |
|                           | anaerobic, room temperature | 60,78                       | 59,62 | 56,73 | 57,09 | 56,43 | 56,00 | 55,62 | 54,14 | 51,53 | 48,48 | 44,78 | 40,96 | 46,81 | 46,51 | 39,66 | 41,04 | 27,89 | 22,24 | 24,47 |
|                           | aerobic, cold room          | 60,78                       | 58,88 | 53,36 | 52,67 | 51,89 | 49,95 | 49,20 | 46,95 | 43,93 | 43,49 | 36,74 | 33,98 | 42,10 | 38,79 | 34,45 | 30,36 | 23,18 | 17,49 | 17,00 |
|                           | aerobic, room temperature   | 60,78                       | 54,03 | 45,60 | 44,35 | 41,82 | 39,84 | 34,91 | 25,76 | 17,76 | 8,67  | 5,71  | 4,56  | 4,78  | 3,45  | 2,90  | 2,18  | 1,32  | 1,10  | 1,09  |
| Strian Wolf pellets       | anaerobic, cold room        | 53,47                       | 56,89 | 55,55 | 56,43 | 55,09 | 56,10 | 53,76 | 55,14 | 50,96 | 53,37 | 51,53 | 56,33 | 50,45 | 51,79 | 46,64 | 47,76 | 48,74 | 52,39 | 51,54 |
|                           | anaerobic, room temperature | 53,47                       | 58,25 | 56,42 | 56,67 | 55,46 | 55,39 | 54,05 | 54,11 | 51,26 | 49,79 | 50,66 | 53,22 | 48,20 | 50,11 | 47,31 | 45,67 | 39,57 | 41,45 | 41,15 |
|                           | aerobic, cold room          | 53,47                       | 44,00 | 26,35 | 16,79 | 4,63  | 7,85  | 4,72  | 4,08  | 2,89  | 3,37  | 3,85  | 3,35  | 2,14  | 2,07  | 1,99  | 1,39  | 0,41  | 1,08  | 1,47  |
|                           | aerobic, room temperature   | 53,47                       | 44,00 | 26,35 | 16,79 | 4,63  | 7,85  | 4,72  | 4,08  | 2,89  | 3,37  | 3,85  | 3,35  | 2,14  | 0,63  | 0,51  | 0,39  | 0,30  | 0,27  | 0,21  |

Supplementary Table S3. Changes in linalool content in all varieties for all storage conditions.

| Variety/form                    | time [months]<br>conditions | 0                            | 1    | 2    | 3    | 4    | 5    | 6    | 7    | 8    | 9    | 10   | 11   | 12   | 14   | 16   | 18   | 20   | 22   | 24   |
|---------------------------------|-----------------------------|------------------------------|------|------|------|------|------|------|------|------|------|------|------|------|------|------|------|------|------|------|
|                                 |                             | Content of linalool [rel. %] |      |      |      |      |      |      |      |      |      |      |      |      |      |      |      |      |      |      |
| Celeia<br>cones                 | anaerobic, cold room        | 0,89                         | 0,90 | 0,95 | 0,97 | 1,02 | 0,97 | 1,06 | 1,06 | 1,07 | 1,11 | 1,10 | 1,17 | 1,22 | 1,23 | 1,27 | 1,21 | 1,33 | 1,15 | 1,18 |
|                                 | anaerobic, room temperature | 0,89                         | 1,01 | 0,98 | 1,02 | 1,10 | 1,05 | 1,20 | 1,17 | 1,23 | 1,35 | 1,45 | 1,48 | 1,25 | 1,65 | 1,67 | 1,57 | 2,00 | 1,96 | 1,87 |
|                                 | aerobic, cold room          | 0,89                         | 1,05 | 1,02 | 1,00 | 1,04 | 1,02 | 1,14 | 1,16 | 1,14 | 1,21 | 1,14 | 1,30 | 1,53 | 1,50 | 1,56 | 1,44 | 1,86 | 1,59 | 1,76 |
|                                 | aerobic, room temperature   | 0,89                         | 1,09 | 1,16 | 1,30 | 1,24 | 1,21 | 1,64 | 1,45 | 1,62 | 1,64 | 1,68 | 2,29 | 2,41 | 2,22 | 2,12 | 2,07 | 1,81 | 1,99 | 2,13 |
| Celeia<br>pellets               | anaerobic, cold room        | 1,23                         | 1,34 | 1,21 | 1,26 | 1,29 | 1,28 | 1,32 | 1,32 | 1,40 | 1,27 | 1,35 | 1,41 | 1,43 | 1,49 | 1,57 | 1,42 | 1,54 | 1,58 | 1,56 |
|                                 | anaerobic, room temperature | 1,23                         | 1,29 | 1,30 | 1,30 | 1,42 | 1,41 | 1,44 | 1,48 | 1,46 | 1,51 | 1,70 | 1,59 | 1,70 | 2,20 | 2,03 | 1,72 | 2,04 | 1,95 | 2,10 |
|                                 | aerobic, cold room          | 1,23                         | 1,62 | 1,70 | 1,75 | 1,69 | 1,42 | 1,57 | 1,69 | 1,62 | 1,60 | 1,61 | 1,72 | 1,73 | 2,00 | 1,57 | 1,34 | 1,28 | 1,22 | 1,38 |
|                                 | aerobic, room temperature   | 1,23                         | 1,49 | 1,74 | 1,77 | 1,77 | 1,42 | 1,50 | 1,70 | 1,35 | 1,51 | 1,22 | 1,05 | 0,95 | 1,05 | 0,88 | 0,85 | 0,73 | 0,65 | 0,63 |
| Aurora<br>cones                 | anaerobic, cold room        | 1,15                         | 1,22 | 1,33 | 1,45 | 1,43 | 1,39 | 1,41 | 1,67 | 1,81 | 1,48 | 1,47 | 1,60 | 1,43 | 1,56 | 1,41 | 1,54 | 1,54 | 1,66 | 1,52 |
|                                 | anaerobic, room temperature | 1,15                         | 1,28 | 1,32 | 1,43 | 1,48 | 1,52 | 1,55 | 1,43 | 1,82 | 1,75 | 1,78 | 1,92 | 1,91 | 1,94 | 1,92 | 2,04 | 2,24 | 2,53 | 2,61 |
|                                 | aerobic, cold room          | 1,15                         | 1,28 | 1,37 | 1,35 | 1,42 | 1,38 | 1,43 | 1,44 | 1,40 | 1,54 | 1,39 | 1,50 | 1,30 | 1,50 | 1,58 | 1,53 | 1,70 | 1,67 | 1,85 |
|                                 | aerobic, room temperature   | 1,15                         | 1,38 | 1,43 | 1,47 | 1,47 | 1,57 | 1,53 | 1,55 | 2,06 | 2,12 | 2,46 | 2,25 | 2,38 | 2,48 | 2,65 | 2,80 | 2,90 | 2,70 | 2,65 |
| Aurora<br>pellets               | anaerobic, cold room        | 1,48                         | 1,43 | 1,48 | 1,62 | 1,63 | 1,68 | 1,70 | 1,58 | 1,65 | 1,70 | 1,60 | 1,65 | 1,72 | 1,83 | 1,89 | 1,68 | 2,00 | 1,72 | 1,80 |
|                                 | anaerobic, room temperature | 1,48                         | 1,45 | 1,47 | 1,59 | 1,71 | 1,76 | 1,75 | 1,67 | 1,71 | 1,89 | 1,79 | 1,93 | 1,93 | 2,10 | 2,18 | 2,00 | 2,34 | 2,28 | 2,45 |
|                                 | aerobic, cold room          | 1,48                         | 1,76 | 2,30 | 2,59 | 2,60 | 2,72 | 2,86 | 2,60 | 2,86 | 2,82 | 2,88 | 2,85 | 2,96 | 3,23 | 2,79 | 2,80 | 2,90 | 2,66 | 2,94 |
|                                 | aerobic, room temperature   | 1,48                         | 2,11 | 2,60 | 2,68 | 2,90 | 2,50 | 2,80 | 2,63 | 2,82 | 3,03 | 2,92 | 2,59 | 2,59 | 2,59 | 2,63 | 2,38 | 1,64 | 1,54 | 1,39 |
| Bobek<br>cones                  | anaerobic, cold room        | 1,41                         | 1,49 | 1,58 | 1,56 | 1,68 | 1,61 | 1,80 | 1,78 | 1,80 | 2,07 | 1,83 | 1,76 | 1,83 | 1,90 | 2,06 | 2,04 | 2,22 | 2,35 | 2,05 |
|                                 | anaerobic, room temperature | 1,41                         | 1,46 | 1,61 | 1,70 | 1,74 | 1,73 | 1,85 | 1,92 | 2,22 | 2,62 | 2,74 | 2,55 | 2,43 | 3,26 | 2,89 | 2,72 | 3,49 | 3,63 | 4,23 |
|                                 | aerobic, cold room          | 1,41                         | 1,66 | 1,66 | 1,71 | 1,94 | 1,85 | 1,96 | 2,10 | 2,01 | 2,44 | 2,25 | 2,31 | 2,37 | 2,43 | 2,78 | 2,77 | 2,91 | 3,31 | 3,22 |
|                                 | aerobic, room temperature   | 1,41                         | 1,50 | 1,68 | 1,70 | 2,01 | 1,97 | 2,26 | 3,17 | 3,41 | 3,14 | 3,89 | 4,75 | 4,60 | 4,81 | 4,91 | 4,51 | 4,05 | 4,20 | 4,23 |
| Bobek<br>pellets                | anaerobic, cold room        | 1,58                         | 1,47 | 1,69 | 1,57 | 1,54 | 1,61 | 1,60 | 1,60 | 1,58 | 1,53 | 1,69 | 1,65 | 1,66 | 1,68 | 1,65 | 2,00 | 1,84 | 1,79 | 1,75 |
|                                 | anaerobic, room temperature | 1,58                         | 1,48 | 1,58 | 1,63 | 1,60 | 1,67 | 1,72 | 1,78 | 1,85 | 1,81 | 1,83 | 1,93 | 2,05 | 2,00 | 1,95 | 1,97 | 2,03 | 2,32 | 2,66 |
|                                 | aerobic, cold room          | 1,58                         | 2,39 | 2,82 | 2,85 | 3,24 | 3,10 | 3,20 | 3,42 | 2,93 | 3,09 | 3,56 | 3,45 | 3,42 | 3,87 | 2,50 | 2,88 | 2,99 | 2,74 | 2,91 |
|                                 | aerobic, room temperature   | 1,58                         | 2,44 | 2,99 | 3,29 | 3,11 | 3,52 | 3,34 | 3,26 | 3,54 | 2,26 | 2,03 | 2,00 | 1,93 | 1,93 | 1,92 | 1,85 | 1,35 | 1,30 | 1,18 |
| Styrian Gold<br>cones           | anaerobic, cold room        | 0,32                         | 0,42 | 0,41 | 0,43 | 0,39 | 0,44 | 0,48 | 0,47 | 0,49 | 0,51 | 0,52 | 0,60 | 0,57 | 0,52 | 0,57 | 0,59 | 0,60 | 0,62 | 0,62 |
|                                 | anaerobic, room temperature | 0,32                         | 0,41 | 0,44 | 0,44 | 0,42 | 0,51 | 0,49 | 0,61 | 0,58 | 0,60 | 0,63 | 0,82 | 0,82 | 0,82 | 0,73 | 0,70 | 0,81 | 0,86 | 0,92 |
|                                 | aerobic, cold room          | 0,32                         | 0,42 | 0,42 | 0,43 | 0,40 | 0,43 | 0,46 | 0,41 | 0,47 | 0,47 | 0,51 | 0,59 | 0,60 | 0,63 | 0,68 | 0,68 | 0,69 | 0,74 | 0,82 |
|                                 | aerobic, room temperature   | 0,32                         | 0,41 | 0,43 | 0,40 | 0,43 | 0,47 | 0,56 | 0,62 | 0,73 | 0,76 | 0,80 | 0,89 | 0,92 | 0,99 | 0,82 | 0,81 | 0,88 | 0,93 | 0,87 |
| Savinjski<br>golding<br>pellets | anaerobic, cold room        | 0,85                         | 0,87 | 0,76 | 0,77 | 0,80 | 0,83 | 0,96 | 0,92 | 0,89 | 0,93 | 0,89 | 0,88 | 0,89 | 0,95 | 0,94 | 0,85 | 0,90 | 0,83 | 1,05 |
|                                 | anaerobic, room temperature | 0,85                         | 0,98 | 0,77 | 0,90 | 0,90 | 0,90 | 0,99 | 0,96 | 1,02 | 1,14 | 1,13 | 1,12 | 1,17 | 1,23 | 1,20 | 1,21 | 1,25 | 1,16 | 1,35 |
|                                 | aerobic, cold room          | 0,85                         | 0,81 | 0,89 | 1,06 | 0,98 | 0,90 | 0,93 | 0,95 | 0,91 | 0,90 | 0,88 | 0,95 | 1,03 | 1,00 | 0,96 | 0,85 | 0,90 | 0,89 | 0,82 |
|                                 | aerobic, room temperature   | 0,85                         | 0,87 | 1,03 | 0,98 | 1,02 | 0,81 | 0,99 | 0,88 | 0,79 | 0,78 | 0,77 | 0,76 | 0,65 | 0,44 | 0,38 | 0,56 | 0,50 | 0,30 | 0,33 |
| Styrian Wolf<br>cones           | anaerobic, cold room        | 1,39                         | 1,44 | 1,60 | 1,66 | 1,57 | 1,54 | 1,55 | 1,62 | 1,66 | 1,66 | 1,73 | 2,00 | 1,81 | 1,95 | 2,15 | 2,00 | 2,48 | 2,28 | 2,74 |
|                                 | anaerobic, room temperature | 1,39                         | 1,56 | 1,61 | 1,67 | 1,70 | 1,65 | 1,74 | 1,82 | 1,99 | 2,29 | 2,73 | 2,54 | 2,34 | 2,61 | 2,71 | 2,54 | 3,25 | 3,26 | 3,41 |
|                                 | aerobic, cold room          | 1,39                         | 1,55 | 1,81 | 1,81 | 1,77 | 1,88 | 1,96 | 2,05 | 2,13 | 2,30 | 2,31 | 2,68 | 2,34 | 2,48 | 2,76 | 2,72 | 3,19 | 2,99 | 3,48 |
|                                 | aerobic, room temperature   | 1,39                         | 1,67 | 2,15 | 2,09 | 2,23 | 2,26 | 2,47 | 2,96 | 3,08 | 3,49 | 3,47 | 3,58 | 3,89 | 4,10 | 3,72 | 4,01 | 3,60 | 3,40 | 3,34 |
| Strian Wolf<br>pellets          | anaerobic, cold room        | 1,75                         | 1,66 | 1,72 | 1,73 | 1,66 | 1,68 | 1,88 | 1,79 | 1,92 | 1,85 | 1,93 | 1,95 | 2,23 | 2,02 | 2,19 | 2,15 | 2,37 | 2,06 | 2,20 |
|                                 | anaerobic, room temperature | 1,75                         | 1,73 | 1,79 | 1,81 | 1,86 | 1,86 | 1,95 | 1,99 | 2,09 | 2,19 | 2,23 | 2,24 | 2,56 | 2,28 | 2,42 | 2,38 | 2,93 | 2,82 | 2,95 |
|                                 | aerobic, cold room          | 1,75                         | 2,24 | 3,13 | 3,53 | 3,76 | 3,99 | 4,11 | 4,22 | 4,38 | 4,51 | 4,54 | 4,94 | 3,72 | 4,06 | 3,60 | 3,76 | 3,38 | 3,54 | 3,33 |
|                                 | aerobic, room temperature   | 1,75                         | 1,36 | 4,05 | 5,40 | 4,36 | 3,84 | 3,74 | 3,27 | 3,25 | 2,77 | 3,08 | 3,16 | 3,29 | 3,07 | 3,00 | 2,30 | 1,73 | 1,82 | 1,49 |

Supplementary Table S4. Changes in geraniol content in all varieties for all storage conditions.

| Variety/form              | time [months]<br>conditions | 0                            | 1    | 2    | 3    | 4    | 5    | 6    | 7    | 8    | 9    | 10   | 11   | 12   | 14   | 16   | 18   | 20   | 22   | 24   |
|---------------------------|-----------------------------|------------------------------|------|------|------|------|------|------|------|------|------|------|------|------|------|------|------|------|------|------|
|                           |                             | Content of geraniol [rel. %] |      |      |      |      |      |      |      |      |      |      |      |      |      |      |      |      |      |      |
| Celeia cones              | anaerobic, cold room        | 0,12                         | 0,11 | 0,08 | 0,07 | 0,12 | 0,14 | 0,12 | 0,13 | 0,09 | 0,12 | 0,11 | 0,08 | 0,12 | 0,10 | 0,16 | 0,15 | 0,16 | 0,18 | 0,14 |
|                           | anaerobic, room temperature | 0,12                         | 0,07 | 0,11 | 0,12 | 0,12 | 0,14 | 0,15 | 0,16 | 0,13 | 0,11 | 0,11 | 0,11 | 0,11 | 0,14 | 0,12 | 0,22 | 0,26 | 0,22 | 0,25 |
|                           | aerobic, cold room          | 0,12                         | 0,10 | 0,08 | 0,11 | 0,12 | 0,13 | 0,14 | 0,14 | 0,12 | 0,13 | 0,09 | 0,09 | 0,09 | 0,10 | 0,23 | 0,23 | 0,21 | 0,16 | 0,14 |
|                           | aerobic, room temperature   | 0,12                         | 0,13 | 0,12 | 0,11 | 0,13 | 0,17 | 0,18 | 0,20 | 0,19 | 0,20 | 0,27 | 0,29 | 0,32 | 0,32 | 0,31 | 0,32 | 0,29 | 0,29 | 0,34 |
| Celeia pellets            | anaerobic, cold room        | 0,13                         | 0,12 | 0,10 | 0,09 | 0,13 | 0,12 | 0,13 | 0,13 | 0,12 | 0,11 | 0,11 | 0,11 | 0,12 | 0,17 | 0,16 | 0,15 | 0,14 | 0,12 | 0,16 |
|                           | anaerobic, room temperature | 0,13                         | 0,12 | 0,12 | 0,11 | 0,13 | 0,14 | 0,15 | 0,15 | 0,14 | 0,13 | 0,16 | 0,17 | 0,18 | 0,22 | 0,21 | 0,20 | 0,24 | 0,25 | 0,26 |
|                           | aerobic, cold room          | 0,13                         | 0,18 | 0,18 | 0,22 | 0,22 | 0,20 | 0,24 | 0,25 | 0,24 | 0,24 | 0,27 | 0,27 | 0,28 | 0,27 | 0,26 | 0,22 | 0,26 | 0,31 | 0,32 |
|                           | aerobic, room temperature   | 0,13                         | 0,16 | 0,19 | 0,23 | 0,22 | 0,22 | 0,27 | 0,29 | 0,27 | 0,29 | 0,31 | 0,28 | 0,26 | 0,27 | 0,27 | 0,25 | 0,17 | 0,17 | 0,17 |
| Aurora cones              | anaerobic, cold room        | 0,29                         | 0,26 | 0,27 | 0,31 | 0,30 | 0,30 | 0,30 | 0,33 | 0,31 | 0,32 | 0,32 | 0,32 | 0,28 | 0,28 | 0,29 | 0,30 | 0,30 | 0,31 | 0,28 |
|                           | anaerobic, room temperature | 0,29                         | 0,26 | 0,28 | 0,31 | 0,31 | 0,33 | 0,33 | 0,28 | 0,38 | 0,37 | 0,43 | 0,40 | 0,34 | 0,34 | 0,34 | 0,42 | 0,49 | 0,58 | 0,61 |
|                           | aerobic, cold room          | 0,29                         | 0,29 | 0,31 | 0,33 | 0,36 | 0,35 | 0,35 | 0,34 | 0,34 | 0,35 | 0,35 | 0,35 | 0,28 | 0,30 | 0,33 | 0,39 | 0,43 | 0,43 | 0,46 |
|                           | aerobic, room temperature   | 0,29                         | 0,32 | 0,33 | 0,35 | 0,38 | 0,41 | 0,40 | 0,43 | 0,60 | 0,65 | 0,70 | 0,78 | 0,77 | 0,75 | 0,83 | 0,85 | 0,80 | 0,84 | 0,75 |
| Aurora pellets            | anaerobic, cold room        | 0,33                         | 0,31 | 0,30 | 0,34 | 0,34 | 0,36 | 0,36 | 0,31 | 0,34 | 0,34 | 0,31 | 0,34 | 0,34 | 0,32 | 0,19 | 0,16 | 0,18 | 0,17 | 0,19 |
|                           | anaerobic, room temperature | 0,33                         | 0,31 | 0,30 | 0,33 | 0,35 | 0,37 | 0,38 | 0,35 | 0,38 | 0,42 | 0,39 | 0,40 | 0,38 | 0,39 | 0,42 | 0,43 | 0,48 | 0,49 | 0,51 |
|                           | aerobic, cold room          | 0,33                         | 0,42 | 0,55 | 0,66 | 0,70 | 0,77 | 0,73 | 0,76 | 0,74 | 0,72 | 0,69 | 0,82 | 0,92 | 0,89 | 0,95 | 0,95 | 0,95 | 0,97 | 1,00 |
|                           | aerobic, room temperature   | 0,33                         | 0,50 | 0,67 | 0,67 | 0,84 | 0,85 | 0,84 | 0,97 | 1,00 | 1,09 | 1,07 | 1,10 | 1,16 | 1,09 | 1,18 | 1,08 | 1,12 | 1,07 | 1,08 |
| Bobek cones               | anaerobic, cold room        | 0,16                         | 0,18 | 0,19 | 0,21 | 0,22 | 0,21 | 0,24 | 0,24 | 0,25 | 0,25 | 0,24 | 0,24 | 0,23 | 0,22 | 0,26 | 0,26 | 0,30 | 0,30 | 0,24 |
|                           | anaerobic, room temperature | 0,16                         | 0,19 | 0,19 | 0,23 | 0,24 | 0,25 | 0,25 | 0,26 | 0,32 | 0,35 | 0,37 | 0,30 | 0,30 | 0,36 | 0,35 | 0,36 | 0,44 | 0,52 | 0,51 |
|                           | aerobic, cold room          | 0,16                         | 0,22 | 0,18 | 0,24 | 0,28 | 0,30 | 0,28 | 0,31 | 0,29 | 0,30 | 0,30 | 0,34 | 0,33 | 0,32 | 0,36 | 0,41 | 0,39 | 0,37 | 0,32 |
|                           | aerobic, room temperature   | 0,16                         | 0,19 | 0,23 | 0,25 | 0,30 | 0,32 | 0,34 | 0,47 | 0,53 | 0,58 | 0,60 | 0,72 | 0,75 | 0,73 | 0,75 | 0,69 | 0,60 | 0,64 | 0,68 |
| Bobek pellets             | anaerobic, cold room        | 0,32                         | 0,32 | 0,34 | 0,30 | 0,29 | 0,29 | 0,25 | 0,25 | 0,25 | 0,21 | 0,25 | 0,22 | 0,23 | 0,20 | 0,20 | 0,26 | 0,23 | 0,21 | 0,16 |
|                           | anaerobic, room temperature | 0,32                         | 0,31 | 0,29 | 0,28 | 0,26 | 0,25 | 0,20 | 0,21 | 0,19 | 0,16 | 0,15 | 0,17 | 0,18 | 0,16 | 0,14 | 0,16 | 0,17 | 0,19 | 0,23 |
|                           | aerobic, cold room          | 0,32                         | 0,59 | 0,68 | 0,65 | 0,77 | 0,76 | 0,79 | 0,77 | 0,76 | 0,88 | 0,86 | 0,82 | 0,85 | 0,77 | 0,84 | 0,79 | 0,80 | 0,85 | 0,86 |
|                           | aerobic, room temperature   | 0,32                         | 0,62 | 0,69 | 0,74 | 0,85 | 0,82 | 0,81 | 0,84 | 0,87 | 0,81 | 0,70 | 0,76 | 0,78 | 0,81 | 0,69 | 0,68 | 0,62 | 0,55 | 0,57 |
| Styrian Gold cones        | anaerobic, cold room        | 0,43                         | 0,42 | 0,43 | 0,48 | 0,45 | 0,48 | 0,50 | 0,53 | 0,52 | 0,57 | 0,62 | 0,67 | 0,72 | 0,56 | 0,62 | 0,61 | 0,68 | 0,61 | 0,50 |
|                           | anaerobic, room temperature | 0,43                         | 0,46 | 0,48 | 0,50 | 0,53 | 0,55 | 0,53 | 0,55 | 0,58 | 0,60 | 0,80 | 0,79 | 0,85 | 0,79 | 0,71 | 0,66 | 0,75 | 0,83 | 0,88 |
|                           | aerobic, cold room          | 0,43                         | 0,50 | 0,51 | 0,51 | 0,53 | 0,49 | 0,57 | 0,51 | 0,59 | 0,57 | 0,68 | 0,63 | 0,76 | 0,67 | 0,76 | 0,70 | 0,71 | 0,87 | 0,74 |
|                           | aerobic, room temperature   | 0,43                         | 0,49 | 0,52 | 0,52 | 0,56 | 0,56 | 0,63 | 0,73 | 0,78 | 0,90 | 0,99 | 0,91 | 0,96 | 1,07 | 0,87 | 0,66 | 0,65 | 0,65 | 0,80 |
| Savinjski golding pellets | anaerobic, cold room        | 0,12                         | 0,12 | 0,13 | 0,14 | 0,14 | 0,14 | 0,14 | 0,10 | 0,08 | 0,07 | 0,06 | 0,06 | 0,05 | 0,07 | 0,08 | 0,07 | 0,09 | 0,10 | 0,07 |
|                           | anaerobic, room temperature | 0,12                         | 0,16 | 0,14 | 0,11 | 0,13 | 0,14 | 0,14 | 0,15 | 0,20 | 0,21 | 0,21 | 0,22 | 0,20 | 0,20 | 0,21 | 0,20 | 0,24 | 0,24 | 0,24 |
|                           | aerobic, cold room          | 0,12                         | 0,12 | 0,15 | 0,19 | 0,19 | 0,21 | 0,21 | 0,20 | 0,20 | 0,21 | 0,22 | 0,23 | 0,23 | 0,23 | 0,23 | 0,24 | 0,24 | 0,22 | 0,21 |
|                           | aerobic, room temperature   | 0,12                         | 0,11 | 0,16 | 0,19 | 0,19 | 0,21 | 0,25 | 0,24 | 0,26 | 0,30 | 0,28 | 0,25 | 0,22 | 0,23 | 0,25 | 0,26 | 0,26 | 0,19 | 0,16 |
| Styrian Wolf cones        | anaerobic, cold room        | 0,43                         | 0,46 | 0,54 | 0,57 | 0,54 | 0,52 | 0,54 | 0,53 | 0,52 | 0,52 | 0,52 | 0,66 | 0,56 | 0,57 | 0,66 | 0,64 | 0,72 | 0,79 | 0,79 |
|                           | anaerobic, room temperature | 0,43                         | 0,45 | 0,55 | 0,57 | 0,53 | 0,56 | 0,56 | 0,57 | 0,61 | 0,68 | 0,85 | 0,78 | 0,67 | 0,72 | 0,75 | 0,73 | 0,90 | 0,98 | 0,98 |
|                           | aerobic, cold room          | 0,43                         | 0,48 | 0,62 | 0,62 | 0,61 | 0,66 | 0,64 | 0,67 | 0,71 | 0,75 | 0,75 | 0,84 | 0,72 | 0,70 | 0,80 | 0,86 | 0,92 | 0,95 | 0,97 |
|                           | aerobic, room temperature   | 0,43                         | 0,54 | 0,74 | 0,75 | 0,74 | 0,72 | 0,83 | 0,99 | 1,00 | 1,09 | 1,04 | 1,09 | 1,09 | 1,15 | 1,07 | 1,14 | 1,12 | 0,94 | 0,94 |
| Strian Wolf pellets       | anaerobic, cold room        | 0,63                         | 0,56 | 0,56 | 0,56 | 0,56 | 0,57 | 0,60 | 0,56 | 0,62 | 0,55 | 0,62 | 0,56 | 0,59 | 0,56 | 0,61 | 0,62 | 0,62 | 0,58 | 0,55 |
|                           | anaerobic, room temperature | 0,63                         | 0,54 | 0,53 | 0,53 | 0,55 | 0,55 | 0,54 | 0,53 | 0,47 | 0,58 | 0,57 | 0,53 | 0,56 | 0,50 | 0,55 | 0,60 | 0,64 | 0,63 | 0,64 |
|                           | aerobic, cold room          | 0,63                         | 0,80 | 1,07 | 1,31 | 1,55 | 1,56 | 1,57 | 1,63 | 1,72 | 1,74 | 1,77 | 1,80 | 1,77 | 1,76 | 1,48 | 1,51 | 1,50 | 1,43 | 1,55 |
|                           | aerobic, room temperature   | 0,63                         | 1,20 | 1,54 | 1,74 | 1,66 | 1,66 | 1,78 | 1,77 | 1,66 | 1,46 | 1,53 | 1,53 | 1,43 | 1,45 | 1,38 | 1,35 | 1,15 | 1,13 | 1,09 |

Supplementary Table S5. Changes in beta-caryophyllene content in all varieties for all storage conditions.

| Variety/form                    | time [months]<br>conditions | 0                                      | 1     | 2     | 3     | 4     | 5     | 6     | 7     | 8     | 9     | 10    | 11    | 12    | 14    | 16    | 18    | 20    | 22    | 24    |
|---------------------------------|-----------------------------|----------------------------------------|-------|-------|-------|-------|-------|-------|-------|-------|-------|-------|-------|-------|-------|-------|-------|-------|-------|-------|
|                                 |                             | Content of beta-caryophyllene [rel. %] |       |       |       |       |       |       |       |       |       |       |       |       |       |       |       |       |       |       |
| Celeia<br>cones                 | anaerobic, cold room        | 8,50                                   | 8,41  | 8,01  | 8,25  | 8,18  | 8,13  | 8,51  | 8,15  | 8,58  | 8,38  | 8,13  | 8,25  | 7,87  | 8,23  | 8,51  | 8,78  | 8,28  | 8,43  | 8,40  |
|                                 | anaerobic, room temperature | 8,50                                   | 8,37  | 8,39  | 8,39  | 8,27  | 8,39  | 8,46  | 8,41  | 8,74  | 8,48  | 8,89  | 8,98  | 8,73  | 8,94  | 8,77  | 9,32  | 8,61  | 8,48  | 8,55  |
|                                 | aerobic, cold room          | 8,50                                   | 8,74  | 8,76  | 8,46  | 8,52  | 8,09  | 8,37  | 8,02  | 8,06  | 8,28  | 7,95  | 7,55  | 7,58  | 7,62  | 7,04  | 7,37  | 6,57  | 6,25  | 5,85  |
|                                 | aerobic, room temperature   | 8,501                                  | 8,955 | 9,181 | 8,70  | 8,65  | 8,28  | 8,18  | 8,16  | 7,66  | 6,87  | 5,70  | 4,78  | 4,77  | 4,11  | 4,24  | 3,54  | 3,53  | 2,53  | 2,52  |
| Celeia<br>pellets               | anaerobic, cold room        | 9,45                                   | 9,65  | 10,41 | 10,05 | 10,01 | 10,09 | 10,40 | 9,94  | 10,40 | 11,19 | 10,42 | 10,41 | 10,29 | 11,12 | 10,58 | 11,30 | 11,00 | 11,13 | 10,49 |
|                                 | anaerobic, room temperature | 9,45                                   | 9,73  | 10,12 | 10,12 | 9,97  | 10,06 | 10,28 | 10,32 | 10,83 | 11,02 | 11,38 | 11,22 | 11,57 | 11,33 | 11,55 | 11,61 | 11,70 | 12,02 | 11,54 |
|                                 | aerobic, cold room          | 9,45                                   | 13,24 | 13,91 | 14,12 | 14,29 | 13,42 | 13,34 | 12,66 | 12,57 | 12,65 | 11,43 | 11,79 | 11,51 | 10,91 | 9,46  | 8,86  | 8,00  | 7,38  | 7,27  |
|                                 | aerobic, room temperature   | 9,45                                   | 13,29 | 14,08 | 14,63 | 13,90 | 13,49 | 12,39 | 12,80 | 11,72 | 10,90 | 8,69  | 7,24  | 6,99  | 6,08  | 5,52  | 5,28  | 3,25  | 2,01  | 1,66  |
| Aurora<br>cones                 | anaerobic, cold room        | 4,15                                   | 4,15  | 4,10  | 4,02  | 4,26  | 4,26  | 4,08  | 4,19  | 4,45  | 4,53  | 4,13  | 4,09  | 4,70  | 4,68  | 4,31  | 4,85  | 4,81  | 4,22  | 4,36  |
|                                 | anaerobic, room temperature | 4,15                                   | 4,06  | 4,07  | 4,03  | 4,18  | 4,23  | 4,13  | 4,05  | 4,66  | 4,74  | 4,79  | 4,75  | 4,68  | 4,72  | 5,01  | 4,99  | 5,40  | 5,36  | 5,63  |
|                                 | aerobic, cold room          | 4,15                                   | 4,63  | 4,63  | 4,63  | 4,42  | 4,58  | 5,00  | 4,38  | 4,65  | 5,10  | 4,59  | 4,45  | 4,40  | 4,51  | 4,65  | 4,53  | 4,63  | 4,38  | 4,06  |
|                                 | aerobic, room temperature   | 4,15                                   | 4,67  | 4,58  | 4,37  | 4,40  | 4,45  | 4,61  | 4,74  | 4,76  | 4,04  | 3,55  | 3,67  | 3,43  | 2,83  | 2,51  | 2,17  | 1,58  | 1,21  | 1,12  |
| Aurora<br>pellets               | anaerobic, cold room        | 4,26                                   | 4,75  | 4,71  | 4,59  | 4,84  | 4,93  | 4,80  | 4,99  | 5,06  | 5,10  | 5,31  | 5,04  | 5,41  | 5,48  | 5,95  | 5,34  | 5,74  | 5,45  | 5,46  |
|                                 | anaerobic, room temperature | 4,26                                   | 4,84  | 4,73  | 4,61  | 4,68  | 4,70  | 4,99  | 5,13  | 5,21  | 5,38  | 5,78  | 5,47  | 5,31  | 5,59  | 5,64  | 5,91  | 6,11  | 6,07  | 6,34  |
|                                 | aerobic, cold room          | 4,26                                   | 5,93  | 7,85  | 8,59  | 8,54  | 9,12  | 9,14  | 9,08  | 9,34  | 9,64  | 9,42  | 9,16  | 9,48  | 9,44  | 8,87  | 8,57  | 8,37  | 7,74  | 7,69  |
|                                 | aerobic, room temperature   | 4,26                                   | 6,99  | 9,43  | 9,45  | 9,48  | 9,40  | 9,31  | 9,25  | 9,00  | 8,80  | 8,69  | 8,71  | 8,31  | 7,69  | 7,53  | 7,23  | 5,35  | 4,53  | 3,53  |
| Bobek<br>cones                  | anaerobic, cold room        | 3,66                                   | 3,80  | 4,02  | 3,69  | 3,84  | 3,91  | 3,97  | 4,04  | 4,99  | 5,35  | 3,85  | 3,83  | 3,92  | 3,75  | 4,25  | 4,01  | 4,50  | 4,39  | 4,18  |
|                                 | anaerobic, room temperature | 3,66                                   | 3,85  | 3,99  | 3,86  | 3,87  | 3,89  | 3,68  | 4,32  | 4,50  | 4,86  | 4,25  | 3,73  | 3,94  | 3,67  | 3,95  | 4,48  | 4,71  | 5,11  | 4,80  |
|                                 | aerobic, cold room          | 3,66                                   | 4,47  | 4,23  | 3,97  | 4,44  | 4,17  | 4,05  | 4,40  | 5,15  | 4,81  | 4,01  | 3,57  | 3,54  | 3,52  | 3,23  | 3,90  | 3,60  | 3,72  | 3,46  |
|                                 | aerobic, room temperature   | 3,66                                   | 3,95  | 4,22  | 4,00  | 4,36  | 4,18  | 3,99  | 4,39  | 4,25  | 3,05  | 2,70  | 2,79  | 2,83  | 2,41  | 2,22  | 2,35  | 1,71  | 1,50  | 1,37  |
| Bobek<br>pellets                | anaerobic, cold room        | 5,10                                   | 5,70  | 5,64  | 5,74  | 5,70  | 5,57  | 5,88  | 5,90  | 5,88  | 5,95  | 5,90  | 6,17  | 6,15  | 6,21  | 6,57  | 6,89  | 6,65  | 6,67  | 6,23  |
|                                 | anaerobic, room temperature | 5,10                                   | 5,54  | 5,40  | 5,53  | 5,77  | 5,65  | 5,94  | 6,10  | 6,26  | 6,39  | 6,75  | 6,44  | 6,46  | 6,48  | 6,49  | 6,60  | 6,95  | 7,17  | 7,84  |
|                                 | aerobic, cold room          | 5,10                                   | 8,60  | 9,88  | 9,86  | 11,66 | 11,18 | 11,76 | 12,21 | 11,38 | 11,80 | 11,59 | 11,91 | 12,06 | 12,52 | 10,89 | 10,76 | 10,49 | 10,20 | 10,50 |
|                                 | aerobic, room temperature   | 5,10                                   | 9,60  | 10,25 | 11,13 | 12,25 | 11,63 | 11,20 | 9,52  | 6,10  | 3,34  | 2,04  | 1,86  | 1,67  | 1,47  | 0,96  | 0,57  | 0,50  | 0,47  | 0,56  |
| Styrian Gold<br>cones           | anaerobic, cold room        | 9,79                                   | 10,28 | 10,21 | 9,38  | 9,92  | 9,88  | 10,34 | 10,34 | 10,89 | 10,59 | 11,05 | 10,71 | 12,31 | 12,16 | 12,07 | 11,29 | 10,96 | 10,68 | 10,58 |
|                                 | anaerobic, room temperature | 9,79                                   | 10,76 | 10,16 | 9,79  | 9,97  | 9,82  | 10,55 | 10,51 | 10,77 | 10,30 | 9,90  | 10,34 | 11,13 | 9,34  | 10,44 | 10,17 | 10,54 | 10,11 | 8,53  |
|                                 | aerobic, cold room          | 9,79                                   | 11,01 | 10,81 | 9,76  | 10,15 | 9,89  | 10,83 | 10,67 | 11,26 | 10,78 | 10,23 | 10,04 | 11,61 | 10,09 | 10,08 | 10,41 | 10,08 | 9,93  | 9,23  |
|                                 | aerobic, room temperature   | 9,79                                   | 10,95 | 10,35 | 10,28 | 9,79  | 10,08 | 10,20 | 9,30  | 8,37  | 6,63  | 5,99  | 5,87  | 5,06  | 4,83  | 3,86  | 3,27  | 2,62  | 1,90  | 1,83  |
| Savinjski<br>golding<br>pellets | anaerobic, cold room        | 11,34                                  | 11,08 | 11,40 | 11,00 | 11,87 | 11,32 | 11,17 | 11,70 | 11,68 | 11,70 | 12,41 | 12,59 | 12,25 | 12,29 | 12,61 | 12,71 | 12,90 | 13,10 | 12,13 |
|                                 | anaerobic, room temperature | 11,34                                  | 11,36 | 11,47 | 11,22 | 11,34 | 11,55 | 11,59 | 11,93 | 12,16 | 12,22 | 12,70 | 12,34 | 12,31 | 12,77 | 12,85 | 13,12 | 13,40 | 12,81 | 13,08 |
|                                 | aerobic, cold room          | 11,34                                  | 11,13 | 14,81 | 15,55 | 15,48 | 15,11 | 15,31 | 15,06 | 15,26 | 15,35 | 14,92 | 14,97 | 14,65 | 15,17 | 15,29 | 13,82 | 13,87 | 13,79 | 13,10 |
|                                 | aerobic, room temperature   | 11,34                                  | 15,73 | 16,11 | 16,02 | 16,07 | 14,97 | 15,06 | 15,03 | 14,19 | 13,47 | 12,70 | 11,82 | 10,90 | 9,06  | 8,67  | 9,39  | 7,59  | 4,99  | 4,87  |
| Styrian Wolf<br>cones           | anaerobic, cold room        | 3,58                                   | 3,44  | 3,79  | 3,81  | 3,78  | 3,62  | 3,72  | 3,82  | 3,77  | 3,68  | 3,73  | 3,80  | 3,92  | 4,02  | 4,33  | 4,42  | 4,59  | 4,64  | 4,06  |
|                                 | anaerobic, room temperature | 3,58                                   | 3,32  | 3,77  | 3,65  | 3,64  | 3,69  | 3,69  | 3,81  | 4,01  | 3,97  | 4,10  | 4,11  | 4,12  | 4,22  | 4,40  | 4,53  | 5,08  | 4,89  | 4,74  |
|                                 | aerobic, cold room          | 3,58                                   | 3,70  | 3,90  | 3,85  | 3,84  | 3,93  | 3,90  | 3,91  | 3,97  | 3,95  | 4,03  | 3,98  | 3,60  | 3,53  | 3,39  | 3,24  | 3,18  | 2,75  | 2,82  |
|                                 | aerobic, room temperature   | 3,58                                   | 3,70  | 4,27  | 3,96  | 3,98  | 3,57  | 3,75  | 3,40  | 3,06  | 2,39  | 1,97  | 1,65  | 1,61  | 1,36  | 1,29  | 1,03  | 0,80  | 0,65  | 0,61  |
| Strian Wolf<br>pellets          | anaerobic, cold room        | 3,77                                   | 3,53  | 3,63  | 3,53  | 3,57  | 3,57  | 3,81  | 3,72  | 4,06  | 3,86  | 4,02  | 3,62  | 4,03  | 4,13  | 4,41  | 4,33  | 4,06  | 3,98  | 3,98  |
|                                 | anaerobic, room temperature | 3,77                                   | 3,35  | 3,52  | 3,49  | 3,51  | 3,63  | 3,83  | 3,76  | 4,14  | 4,06  | 3,99  | 3,82  | 4,16  | 4,17  | 4,34  | 4,45  | 4,70  | 4,75  | 4,67  |
|                                 | aerobic, cold room          | 3,77                                   | 4,58  | 6,08  | 6,67  | 7,38  | 7,09  | 7,38  | 7,36  | 7,22  | 7,03  | 6,90  | 6,68  | 5,81  | 5,36  | 4,79  | 4,20  | 3,23  | 3,16  | 2,77  |
|                                 | aerobic, room temperature   | 3,77                                   | 6,21  | 7,29  | 7,26  | 6,95  | 6,15  | 5,45  | 4,94  | 2,97  | 2,91  | 2,78  | 2,30  | 2,51  | 2,48  | 2,19  | 1,57  | 0,83  | 0,76  | 0,76  |

Supplementary Table S6. Changes in alpha-humulene content in all varieties for all storage conditions.

| Variety/form                    | time [months]<br>conditions | 0                                  | 1     | 2     | 3     | 4     | 5     | 6     | 7     | 8     | 9     | 10    | 11    | 12    | 14    | 16    | 18    | 20    | 22    | 24    |
|---------------------------------|-----------------------------|------------------------------------|-------|-------|-------|-------|-------|-------|-------|-------|-------|-------|-------|-------|-------|-------|-------|-------|-------|-------|
|                                 |                             | Content of alpha-humulene [rel. %] |       |       |       |       |       |       |       |       |       |       |       |       |       |       |       |       |       |       |
| Celeia<br>cones                 | anaerobic, cold room        | 16,30                              | 16,33 | 15,63 | 16,11 | 15,99 | 16,21 | 17,07 | 16,26 | 17,34 | 17,04 | 16,58 | 17,30 | 16,18 | 17,70 | 18,00 | 18,55 | 17,56 | 17,91 | 18,14 |
|                                 | anaerobic, room temperature | 16,30                              | 16,43 | 16,46 | 16,85 | 16,58 | 17,29 | 17,43 | 17,48 | 18,14 | 18,03 | 19,22 | 19,94 | 20,05 | 20,16 | 19,46 | 21,05 | 20,54 | 20,30 | 20,88 |
|                                 | aerobic, cold room          | 16,30                              | 16,63 | 16,97 | 16,64 | 17,08 | 16,18 | 16,92 | 16,09 | 16,59 | 17,06 | 16,47 | 18,00 | 19,19 | 16,00 | 15,26 | 16,41 | 14,49 | 14,20 | 13,37 |
|                                 | aerobic, room temperature   | 16,30                              | 17,40 | 18,08 | 17,11 | 17,27 | 17,31 | 17,48 | 17,75 | 17,29 | 16,41 | 14,57 | 12,89 | 12,76 | 11,08 | 11,17 | 9,80  | 9,73  | 6,89  | 6,78  |
| Celeia<br>pellets               | anaerobic, cold room        | 18,34                              | 18,66 | 19,49 | 19,52 | 19,52 | 19,64 | 20,49 | 19,46 | 20,63 | 22,30 | 20,72 | 20,96 | 20,64 | 23,81 | 21,40 | 22,90 | 22,55 | 22,56 | 21,31 |
|                                 | anaerobic, room temperature | 18,34                              | 18,92 | 19,89 | 19,96 | 19,50 | 19,77 | 20,64 | 20,71 | 21,94 | 22,54 | 23,86 | 23,71 | 24,22 | 24,53 | 24,58 | 25,32 | 25,57 | 26,37 | 26,06 |
|                                 | aerobic, cold room          | 18,34                              | 26,43 | 27,97 | 30,10 | 30,33 | 28,09 | 28,74 | 27,62 | 27,60 | 28,19 | 26,54 | 26,97 | 26,12 | 26,80 | 23,26 | 24,42 | 23,10 | 19,71 | 18,94 |
|                                 | aerobic, room temperature   | 18,34                              | 26,48 | 28,69 | 30,70 | 29,04 | 29,35 | 28,53 | 28,68 | 28,06 | 26,24 | 23,07 | 20,28 | 19,76 | 17,49 | 16,75 | 16,35 | 10,59 | 6,92  | 5,29  |
| Aurora<br>cones                 | anaerobic, cold room        | 11,87                              | 11,98 | 11,80 | 11,71 | 12,48 | 12,58 | 11,88 | 12,96 | 13,37 | 13,29 | 12,64 | 12,25 | 14,01 | 14,03 | 12,80 | 14,53 | 14,53 | 12,79 | 13,04 |
|                                 | anaerobic, room temperature | 11,87                              | 12,01 | 11,90 | 11,78 | 12,35 | 12,57 | 12,12 | 12,27 | 14,37 | 14,60 | 15,28 | 15,02 | 14,50 | 14,73 | 15,82 | 15,79 | 17,66 | 18,08 | 18,83 |
|                                 | aerobic, cold room          | 11,87                              | 13,46 | 13,80 | 12,83 | 13,16 | 13,66 | 13,32 | 13,45 | 14,23 | 15,55 | 13,96 | 13,72 | 13,23 | 13,69 | 14,52 | 14,15 | 14,82 | 14,19 | 13,25 |
|                                 | aerobic, room temperature   | 11,87                              | 13,80 | 14,05 | 13,18 | 14,18 | 13,75 | 14,30 | 15,27 | 16,11 | 14,85 | 13,65 | 13,60 | 12,86 | 10,89 | 9,70  | 8,35  | 6,37  | 4,81  | 4,22  |
| Aurora<br>pellets               | anaerobic, cold room        | 12,53                              | 14,04 | 13,88 | 13,60 | 14,37 | 15,00 | 14,25 | 14,93 | 15,25 | 15,36 | 16,20 | 15,24 | 16,35 | 16,44 | 18,10 | 16,16 | 17,60 | 16,66 | 16,71 |
|                                 | anaerobic, room temperature | 12,53                              | 14,35 | 14,00 | 13,70 | 13,95 | 14,35 | 15,06 | 15,80 | 16,22 | 17,14 | 18,71 | 17,41 | 16,93 | 17,78 | 18,04 | 19,14 | 20,43 | 20,81 | 21,64 |
|                                 | aerobic, cold room          | 12,53                              | 17,65 | 23,28 | 26,31 | 26,61 | 28,88 | 28,74 | 29,14 | 29,56 | 31,68 | 31,54 | 30,54 | 32,31 | 31,95 | 31,04 | 31,76 | 30,53 | 29,27 | 28,94 |
|                                 | aerobic, room temperature   | 12,53                              | 21,07 | 27,90 | 25,56 | 30,68 | 30,56 | 32,30 | 31,73 | 33,30 | 35,51 | 33,49 | 34,46 | 34,33 | 32,24 | 31,62 | 30,51 | 24,60 | 20,90 | 16,72 |
| Bobek<br>cones                  | anaerobic, cold room        | 9,16                               | 9,60  | 10,33 | 9,36  | 9,83  | 10,17 | 10,30 | 10,51 | 10,42 | 10,32 | 10,27 | 10,10 | 10,43 | 9,89  | 11,43 | 10,74 | 12,29 | 12,11 | 11,19 |
|                                 | anaerobic, room temperature | 9,16                               | 9,75  | 10,22 | 9,84  | 9,94  | 10,20 | 9,57  | 11,52 | 12,26 | 13,79 | 12,49 | 10,58 | 11,04 | 10,51 | 11,42 | 12,89 | 14,18 | 15,96 | 14,76 |
|                                 | aerobic, cold room          | 9,16                               | 11,35 | 10,89 | 10,31 | 11,63 | 11,22 | 10,77 | 11,85 | 13,29 | 13,28 | 11,27 | 9,96  | 9,97  | 9,98  | 9,44  | 11,35 | 10,75 | 11,33 | 10,57 |
|                                 | aerobic, room temperature   | 9,16                               | 10,04 | 10,81 | 10,30 | 11,51 | 11,59 | 11,17 | 12,94 | 13,28 | 10,32 | 9,56  | 9,73  | 10,07 | 8,29  | 7,91  | 8,16  | 6,00  | 5,26  | 4,73  |
| Bobek<br>pellets                | anaerobic, cold room        | 12,16                              | 13,29 | 13,30 | 13,36 | 13,42 | 12,95 | 13,85 | 13,99 | 13,89 | 14,22 | 14,01 | 14,57 | 14,43 | 14,65 | 15,68 | 16,80 | 15,85 | 16,08 | 14,98 |
|                                 | anaerobic, room temperature | 12,16                              | 12,96 | 12,53 | 12,92 | 13,66 | 13,23 | 14,09 | 14,65 | 15,22 | 15,83 | 16,61 | 15,84 | 15,86 | 15,88 | 15,90 | 16,44 | 17,20 | 18,03 | 20,39 |
|                                 | aerobic, cold room          | 12,16                              | 20,55 | 23,79 | 23,84 | 28,67 | 27,42 | 29,62 | 30,30 | 29,24 | 31,90 | 30,10 | 31,71 | 31,65 | 32,61 | 31,52 | 30,24 | 30,43 | 29,48 | 31,29 |
|                                 | aerobic, room temperature   | 12,16                              | 22,15 | 24,78 | 27,56 | 31,81 | 29,89 | 30,22 | 26,95 | 18,76 | 11,70 | 7,34  | 5,72  | 5,30  | 5,00  | 3,24  | 1,76  | 1,34  | 1,57  | 1,71  |
| Styrian Gold<br>cones           | anaerobic, cold room        | 19,10                              | 20,33 | 20,16 | 18,59 | 19,78 | 19,53 | 21,08 | 20,90 | 22,29 | 22,34 | 23,26 | 22,17 | 25,73 | 25,87 | 25,34 | 23,94 | 23,23 | 22,58 | 21,98 |
|                                 | anaerobic, room temperature | 19,10                              | 21,59 | 20,29 | 19,49 | 20,26 | 19,68 | 21,78 | 21,65 | 23,32 | 23,18 | 22,69 | 22,63 | 25,39 | 21,10 | 23,09 | 24,18 | 24,75 | 24,59 | 24,23 |
|                                 | aerobic, cold room          | 19,10                              | 22,02 | 21,68 | 19,53 | 20,73 | 19,77 | 22,09 | 21,76 | 23,44 | 23,17 | 21,91 | 21,31 | 25,00 | 22,03 | 22,09 | 23,38 | 22,32 | 22,36 | 20,49 |
|                                 | aerobic, room temperature   | 19,10                              | 22,12 | 21,17 | 21,03 | 20,24 | 21,14 | 22,32 | 20,99 | 18,28 | 17,52 | 15,99 | 14,74 | 13,73 | 13,25 | 11,11 | 9,65  | 7,56  | 5,90  | 5,31  |
| Savinjski<br>golding<br>pellets | anaerobic, cold room        | 30,62                              | 30,19 | 30,77 | 30,33 | 32,37 | 31,20 | 30,31 | 32,16 | 32,24 | 32,50 | 35,17 | 35,38 | 34,46 | 34,59 | 35,41 | 35,84 | 37,99 | 37,99 | 34,40 |
|                                 | anaerobic, room temperature | 30,62                              | 30,20 | 31,36 | 28,44 | 29,66 | 31,83 | 31,92 | 33,58 | 34,71 | 36,13 | 37,97 | 37,98 | 36,48 | 37,40 | 38,55 | 39,19 | 42,02 | 40,86 | 40,64 |
|                                 | aerobic, cold room          | 30,62                              | 30,24 | 40,73 | 37,79 | 44,65 | 45,67 | 44,38 | 44,02 | 45,03 | 45,78 | 44,92 | 45,76 | 44,71 | 45,84 | 46,62 | 44,19 | 44,59 | 44,31 | 43,25 |
|                                 | aerobic, room temperature   | 30,62                              | 44,20 | 44,98 | 47,95 | 46,39 | 46,41 | 46,75 | 46,60 | 46,48 | 44,91 | 39,20 | 41,52 | 40,05 | 37,97 | 36,27 | 36,47 | 31,92 | 22,09 | 22,28 |
| Styrian Wolf<br>cones           | anaerobic, cold room        | 8,24                               | 8,14  | 8,89  | 8,87  | 8,81  | 8,56  | 8,68  | 9,01  | 8,98  | 8,69  | 9,00  | 10,57 | 9,28  | 9,50  | 10,46 | 10,65 | 11,22 | 11,57 | 10,18 |
|                                 | anaerobic, room temperature | 8,24                               | 7,85  | 8,90  | 8,65  | 8,60  | 8,82  | 8,77  | 9,15  | 9,86  | 9,87  | 10,95 | 11,57 | 10,17 | 10,42 | 11,19 | 11,45 | 13,56 | 13,79 | 13,02 |
|                                 | aerobic, cold room          | 8,24                               | 8,22  | 9,32  | 9,15  | 9,23  | 10,00 | 9,44  | 9,64  | 9,79  | 9,75  | 10,38 | 10,13 | 9,06  | 8,93  | 8,69  | 8,65  | 8,68  | 7,82  | 7,75  |
|                                 | aerobic, room temperature   | 8,24                               | 9,04  | 10,37 | 9,81  | 9,96  | 9,23  | 9,59  | 9,13  | 8,70  | 7,25  | 6,30  | 5,36  | 5,18  | 4,47  | 4,43  | 3,58  | 2,94  | 2,47  | 2,21  |
| Strian Wolf<br>pellets          | anaerobic, cold room        | 9,43                               | 8,74  | 8,96  | 8,78  | 9,07  | 8,92  | 9,57  | 9,33  | 10,31 | 9,82  | 10,22 | 9,00  | 10,12 | 10,34 | 11,20 | 11,19 | 10,30 | 10,14 | 9,99  |
|                                 | anaerobic, room temperature | 9,43                               | 8,36  | 8,86  | 8,84  | 9,04  | 9,26  | 9,79  | 9,70  | 10,71 | 10,78 | 10,59 | 9,96  | 10,88 | 10,91 | 11,40 | 11,94 | 12,90 | 13,15 | 12,79 |
|                                 | aerobic, cold room          | 9,43                               | 11,47 | 15,46 | 17,48 | 20,16 | 19,16 | 19,97 | 20,30 | 20,36 | 19,97 | 19,75 | 19,64 | 17,38 | 16,74 | 14,74 | 13,51 | 9,38  | 10,47 | 10,66 |
|                                 | aerobic, room temperature   | 9,43                               | 16,46 | 20,39 | 20,91 | 17,94 | 18,53 | 17,52 | 16,75 | 10,86 | 10,64 | 9,99  | 8,81  | 9,03  | 9,16  | 8,19  | 6,03  | 2,64  | 2,40  | 2,25  |

Supplementary Table S7. Changes in beta-farnesene content in all varieties for all storage conditions.

| Variety/form                    | time [months]<br>conditions | 0                                  | 1    | 2     | 3     | 4    | 5    | 6    | 7    | 8    | 9    | 10   | 11   | 12   | 14   | 16   | 18   | 20   | 22   | 24   |
|---------------------------------|-----------------------------|------------------------------------|------|-------|-------|------|------|------|------|------|------|------|------|------|------|------|------|------|------|------|
|                                 |                             | Content of beta-farnesene [rel. %] |      |       |       |      |      |      |      |      |      |      |      |      |      |      |      |      |      |      |
| Celeia<br>cones                 | anaerobic, cold room        | 4,72                               | 4,51 | 4,47  | 4,29  | 4,22 | 4,22 | 4,33 | 4,22 | 4,35 | 4,32 | 4,20 | 3,97 | 3,90 | 3,93 | 3,95 | 4,07 | 3,74 | 3,96 | 3,80 |
|                                 | anaerobic, room temperature | 4,72                               | 4,27 | 4,41  | 4,24  | 4,21 | 4,21 | 4,10 | 3,81 | 4,13 | 3,62 | 3,45 | 3,24 | 3,38 | 3,14 | 3,09 | 3,13 | 2,26 | 1,98 | 2,01 |
|                                 | aerobic, cold room          | 4,72                               | 4,58 | 4,51  | 4,27  | 4,30 | 3,97 | 4,04 | 3,76 | 3,88 | 3,86 | 3,67 | 3,27 | 3,08 | 3,11 | 2,74 | 2,68 | 2,18 | 2,17 | 2,10 |
|                                 | aerobic, room temperature   | 4,72                               | 4,59 | 4,38  | 4,07  | 3,94 | 3,66 | 3,42 | 2,99 | 2,44 | 1,79 | 1,19 | 0,91 | 0,86 | 0,78 | 0,90 | 0,62 | 0,64 | 0,46 | 0,40 |
| Celeia<br>pellets               | anaerobic, cold room        | 5,28                               | 5,16 | 5,32  | 5,40  | 5,13 | 5,10 | 5,45 | 5,18 | 5,32 | 5,73 | 5,16 | 5,18 | 5,03 | 4,91 | 4,73 | 5,19 | 4,68 | 4,78 | 4,58 |
|                                 | anaerobic, room temperature | 5,28                               | 5,15 | 5,35  | 5,22  | 4,93 | 4,94 | 5,02 | 4,78 | 5,03 | 4,56 | 3,92 | 4,17 | 4,00 | 3,15 | 3,18 | 3,17 | 2,61 | 2,57 | 1,81 |
|                                 | aerobic, cold room          | 5,28                               | 6,85 | 6,91  | 5,15  | 5,51 | 5,41 | 5,44 | 5,04 | 4,65 | 3,82 | 3,61 | 3,57 | 3,13 | 2,94 | 2,20 | 1,87 | 1,50 | 1,27 | 1,12 |
|                                 | aerobic, room temperature   | 5,28                               | 6,61 | 6,58  | 5,74  | 5,95 | 4,87 | 3,98 | 3,23 | 2,65 | 1,60 | 1,02 | 0,76 | 0,65 | 0,61 | 0,58 | 0,54 | 0,38 | 0,26 | 0,25 |
| Aurora<br>cones                 | anaerobic, cold room        | 5,70                               | 5,58 | 5,31  | 5,16  | 5,45 | 5,50 | 5,21 | 5,13 | 5,72 | 5,74 | 5,15 | 4,97 | 5,96 | 5,75 | 5,33 | 5,97 | 5,76 | 4,69 | 5,11 |
|                                 | anaerobic, room temperature | 5,70                               | 5,28 | 5,20  | 5,10  | 5,12 | 5,24 | 5,04 | 5,44 | 5,27 | 5,01 | 4,66 | 4,69 | 4,58 | 4,52 | 4,61 | 4,66 | 4,15 | 3,39 | 3,34 |
|                                 | aerobic, cold room          | 5,70                               | 6,33 | 6,19  | 5,61  | 5,66 | 5,87 | 5,51 | 5,60 | 5,76 | 6,00 | 5,17 | 5,04 | 5,02 | 4,82 | 4,69 | 4,48 | 4,22 | 3,86 | 3,38 |
|                                 | aerobic, room temperature   | 5,70                               | 6,12 | 5,93  | 5,52  | 5,47 | 4,90 | 4,95 | 4,50 | 3,59 | 2,23 | 1,41 | 1,26 | 1,27 | 0,87 | 0,71 | 0,53 | 0,36 | 0,45 | 0,40 |
| Aurora<br>pellets               | anaerobic, cold room        | 5,79                               | 6,34 | 6,19  | 5,87  | 6,20 | 6,48 | 6,12 | 6,42 | 6,41 | 6,39 | 6,56 | 6,33 | 6,58 | 6,55 | 7,11 | 6,31 | 6,51 | 6,33 | 6,22 |
|                                 | anaerobic, room temperature | 5,79                               | 6,38 | 6,14  | 5,92  | 5,90 | 5,98 | 6,13 | 6,19 | 6,09 | 6,02 | 6,09 | 5,80 | 5,58 | 5,59 | 5,41 | 5,76 | 5,34 | 5,05 | 4,85 |
|                                 | aerobic, cold room          | 5,79                               | 7,72 | 9,60  | 10,11 | 9,61 | 9,58 | 9,40 | 8,80 | 8,72 | 7,91 | 6,95 | 6,39 | 5,61 | 5,35 | 4,00 | 2,83 | 2,32 | 1,72 | 1,35 |
|                                 | aerobic, room temperature   | 5,79                               | 8,79 | 10,46 | 9,66  | 9,93 | 8,30 | 7,93 | 6,81 | 4,89 | 3,31 | 2,67 | 2,23 | 1,89 | 1,35 | 1,10 | 0,88 | 0,47 | 0,50 | 0,42 |
| Bobek<br>cones                  | anaerobic, cold room        | 4,52                               | 4,53 | 4,59  | 4,23  | 4,29 | 4,52 | 4,34 | 4,43 | 4,43 | 4,00 | 3,94 | 4,10 | 4,21 | 3,95 | 4,34 | 3,77 | 4,23 | 3,66 | 4,02 |
|                                 | anaerobic, room temperature | 4,52                               | 4,63 | 4,44  | 4,27  | 4,22 | 4,30 | 4,01 | 4,50 | 4,50 | 4,64 | 3,10 | 3,05 | 3,23 | 2,66 | 2,84 | 3,41 | 2,72 | 2,50 | 2,36 |
|                                 | aerobic, cold room          | 4,52                               | 5,05 | 4,78  | 4,49  | 4,50 | 4,58 | 4,20 | 4,25 | 4,50 | 4,69 | 3,50 | 3,06 | 2,98 | 2,75 | 2,38 | 2,68 | 2,31 | 1,88 | 1,97 |
|                                 | aerobic, room temperature   | 4,52                               | 4,73 | 4,87  | 4,54  | 4,39 | 4,21 | 3,46 | 3,03 | 2,19 | 1,18 | 0,87 | 0,81 | 0,84 | 0,18 | 0,21 | 0,25 | 0,24 | 0,26 | 0,22 |
| Bobek<br>pellets                | anaerobic, cold room        | 5,14                               | 5,58 | 5,19  | 5,47  | 5,50 | 5,34 | 5,65 | 5,60 | 5,59 | 5,55 | 5,51 | 5,81 | 5,74 | 5,72 | 5,98 | 5,64 | 6,05 | 5,95 | 5,52 |
|                                 | anaerobic, room temperature | 5,14                               | 5,39 | 5,11  | 5,21  | 5,50 | 5,27 | 5,47 | 5,46 | 5,38 | 5,17 | 5,38 | 5,14 | 4,96 | 5,00 | 5,12 | 4,90 | 5,17 | 4,82 | 4,15 |
|                                 | aerobic, cold room          | 5,14                               | 7,96 | 8,15  | 8,21  | 9,42 | 8,92 | 8,65 | 8,76 | 8,06 | 8,46 | 7,42 | 6,63 | 7,31 | 6,64 | 5,83 | 5,19 | 4,50 | 4,12 | 2,32 |
|                                 | aerobic, room temperature   | 5,14                               | 8,15 | 8,50  | 8,42  | 8,37 | 6,92 | 4,80 | 2,06 | 0,31 | 0,35 | 0,34 | 0,32 | 0,33 | 0,33 | 0,34 | 0,31 | 0,36 | 0,34 | 0,35 |
| Styrian Gold<br>cones           | anaerobic, cold room        | 5,13                               | 4,87 | 4,86  | 4,49  | 4,88 | 4,64 | 4,76 | 4,73 | 4,87 | 4,30 | 4,06 | 4,54 | 4,42 | 4,72 | 4,64 | 4,10 | 3,97 | 3,75 | 4,24 |
|                                 | anaerobic, room temperature | 5,13                               | 4,99 | 4,86  | 4,62  | 4,73 | 4,28 | 4,32 | 4,27 | 3,88 | 3,26 | 2,40 | 2,41 | 2,43 | 2,53 | 2,50 | 2,49 | 2,39 | 2,06 | 1,83 |
|                                 | aerobic, cold room          | 5,13                               | 5,16 | 5,06  | 4,67  | 4,86 | 4,63 | 4,98 | 4,95 | 4,86 | 4,23 | 3,76 | 3,41 | 3,16 | 3,10 | 3,06 | 2,90 | 2,94 | 2,60 | 2,46 |
|                                 | aerobic, room temperature   | 5,13                               | 4,98 | 4,95  | 4,80  | 4,54 | 4,26 | 3,74 | 3,02 | 2,20 | 1,31 | 1,02 | 1,16 | 0,65 | 0,74 | 0,61 | 0,52 | 0,42 | 0,11 | 0,18 |
| Savinjski<br>golding<br>pellets | anaerobic, cold room        | 6,47                               | 6,26 | 6,46  | 5,65  | 5,82 | 6,12 | 6,09 | 6,21 | 6,19 | 6,17 | 6,05 | 6,51 | 6,35 | 6,10 | 6,16 | 6,06 | 5,90 | 5,31 | 5,47 |
|                                 | anaerobic, room temperature | 6,47                               | 6,40 | 6,37  | 5,97  | 6,00 | 6,02 | 5,94 | 5,80 | 5,47 | 4,68 | 4,51 | 4,45 | 4,43 | 4,20 | 3,84 | 3,88 | 3,00 | 2,32 | 2,53 |
|                                 | aerobic, cold room          | 6,47                               | 6,38 | 8,19  | 8,01  | 7,82 | 7,80 | 7,64 | 7,65 | 7,91 | 6,86 | 6,58 | 6,50 | 6,48 | 6,50 | 5,18 | 5,44 | 5,20 | 4,32 | 4,05 |
|                                 | aerobic, room temperature   | 6,47                               | 8,61 | 8,73  | 8,60  | 8,42 | 7,05 | 6,54 | 6,13 | 5,35 | 3,96 | 2,48 | 2,55 | 2,47 | 2,26 | 1,84 | 1,43 | 0,25 | 0,25 | 0,26 |
| Styrian Wolf<br>cones           | anaerobic, cold room        | 5,70                               | 5,44 | 5,55  | 5,47  | 5,57 | 5,46 | 5,52 | 5,66 | 5,43 | 5,43 | 5,23 | 5,97 | 5,64 | 5,39 | 5,86 | 5,96 | 5,33 | 5,66 | 5,00 |
|                                 | anaerobic, room temperature | 5,70                               | 5,20 | 5,49  | 5,23  | 5,04 | 5,22 | 5,07 | 5,00 | 4,82 | 4,37 | 3,59 | 4,20 | 4,17 | 3,86 | 3,94 | 4,14 | 3,43 | 2,98 | 2,85 |
|                                 | aerobic, cold room          | 5,70                               | 5,37 | 5,39  | 5,18  | 5,13 | 4,98 | 4,82 | 4,72 | 4,56 | 4,50 | 3,95 | 3,42 | 3,91 | 3,52 | 2,99 | 2,87 | 2,34 | 1,93 | 1,99 |
|                                 | aerobic, room temperature   | 5,70                               | 5,56 | 5,20  | 4,77  | 4,43 | 4,14 | 3,51 | 2,74 | 2,07 | 1,24 | 0,81 | 0,39 | 0,75 | 0,36 | 0,41 | 0,40 | 0,36 | 0,59 | 0,31 |
| Strian Wolf<br>pellets          | anaerobic, cold room        | 6,56                               | 6,07 | 6,05  | 6,01  | 6,08 | 6,10 | 6,22 | 6,21 | 6,89 | 6,29 | 6,63 | 5,84 | 6,18 | 6,44 | 6,61 | 6,62 | 5,96 | 5,81 | 5,75 |
|                                 | anaerobic, room temperature | 6,56                               | 5,69 | 5,80  | 5,82  | 5,87 | 5,92 | 6,05 | 5,84 | 5,93 | 5,84 | 5,69 | 5,27 | 5,43 | 5,59 | 5,63 | 5,64 | 5,22 | 4,99 | 4,78 |
|                                 | aerobic, cold room          | 6,56                               | 7,32 | 8,36  | 8,50  | 4,98 | 4,77 | 5,16 | 4,33 | 3,72 | 2,59 | 2,26 | 1,64 | 1,10 | 0,89 | 0,45 | 0,45 | 0,24 | 0,33 | 0,41 |
|                                 | aerobic, room temperature   | 6,56                               | 7,53 | 5,34  | 4,23  | 1,96 | 1,52 | 0,77 | 0,40 | 0,31 | 0,30 | 0,42 | 0,60 | 0,54 | 0,54 | 0,62 | 0,61 | 0,68 | 0,68 | 0,68 |

Supplementary table S8. Changes in caryophyllene-oxide content in all varieties for all storage conditions.

| Variety/form                    | time [months]<br>conditions | 0                                       | 1    | 2    | 3    | 4    | 5    | 6    | 7    | 8    | 9    | 10   | 11   | 12   | 14   | 16   | 18   | 20   | 22   | 24   |
|---------------------------------|-----------------------------|-----------------------------------------|------|------|------|------|------|------|------|------|------|------|------|------|------|------|------|------|------|------|
|                                 |                             | Content of caryophyllene-oxide [rel. %] |      |      |      |      |      |      |      |      |      |      |      |      |      |      |      |      |      |      |
| Celeia<br>cones                 | anaerobic, cold room        | 0,55                                    | 0,78 | 0,67 | 0,91 | 1,01 | 0,95 | 1,35 | 1,04 | 1,20 | 1,26 | 1,22 | 1,52 | 1,36 | 1,60 | 1,64 | 1,61 | 1,75 | 1,59 | 1,59 |
|                                 | anaerobic, room temperature | 0,55                                    | 0,91 | 0,76 | 0,97 | 1,16 | 1,22 | 1,53 | 1,41 | 1,34 | 1,62 | 1,52 | 1,77 | 2,24 | 1,33 | 1,77 | 1,86 | 1,93 | 1,75 | 2,02 |
|                                 | aerobic, cold room          | 0,54                                    | 0,83 | 0,93 | 1,10 | 1,25 | 1,20 | 1,59 | 1,48 | 1,68 | 1,96 | 1,99 | 2,15 | 1,72 | 2,27 | 2,45 | 2,74 | 2,92 | 3,03 | 3,40 |
|                                 | aerobic, room temperature   | 0,55                                    | 0,93 | 1,32 | 1,68 | 1,76 | 1,84 | 2,51 | 2,60 | 2,97 | 2,99 | 2,50 | 2,45 | 2,13 | 2,55 | 2,44 | 2,40 | 2,11 | 1,98 | 1,82 |
| Celeia<br>pellets               | anaerobic, cold room        | 0,92                                    | 0,98 | 1,28 | 1,05 | 1,12 | 1,12 | 1,19 | 0,98 | 1,24 | 1,16 | 1,11 | 1,15 | 1,23 | 1,19 | 1,26 | 1,34 | 1,54 | 1,45 | 1,45 |
|                                 | anaerobic, room temperature | 0,92                                    | 1,01 | 1,24 | 1,20 | 1,10 | 1,14 | 1,48 | 1,30 | 1,24 | 1,15 | 1,61 | 1,20 | 1,33 | 1,84 | 1,82 | 1,95 | 2,31 | 1,86 | 2,54 |
|                                 | aerobic, cold room          | 0,92                                    | 1,67 | 2,09 | 2,06 | 2,52 | 2,78 | 2,86 | 2,89 | 3,04 | 3,52 | 3,62 | 3,63 | 3,98 | 4,51 | 5,18 | 5,04 | 5,40 | 5,85 | 6,05 |
|                                 | aerobic, room temperature   | 0,92                                    | 1,77 | 2,60 | 2,21 | 2,39 | 3,05 | 3,40 | 3,37 | 3,78 | 4,32 | 4,83 | 5,58 | 5,76 | 6,03 | 6,45 | 6,32 | 7,28 | 7,34 | 7,33 |
| Aurora<br>cones                 | anaerobic, cold room        | 0,32                                    | 0,31 | 0,32 | 0,32 | 0,35 | 0,32 | 0,34 | 0,35 | 0,28 | 0,16 | 0,32 | 0,28 | 0,15 | 0,17 | 0,20 | 0,24 | 0,26 | 0,24 | 0,22 |
|                                 | anaerobic, room temperature | 0,32                                    | 0,30 | 0,33 | 0,33 | 0,33 | 0,38 | 0,38 | 0,31 | 0,38 | 0,25 | 0,42 | 0,40 | 0,19 | 0,28 | 0,33 | 0,33 | 0,45 | 0,52 | 0,50 |
|                                 | aerobic, cold room          | 0,32                                    | 0,37 | 0,40 | 0,41 | 0,45 | 0,43 | 0,41 | 0,43 | 0,31 | 0,26 | 0,21 | 0,42 | 0,21 | 0,30 | 0,32 | 0,38 | 0,56 | 0,59 | 0,52 |
|                                 | aerobic, room temperature   | 0,32                                    | 0,39 | 0,43 | 0,49 | 0,55 | 0,54 | 0,60 | 0,53 | 0,81 | 1,11 | 1,10 | 0,87 | 0,66 | 0,88 | 1,09 | 1,14 | 1,33 | 1,39 | 1,28 |
| Aurora<br>pellets               | anaerobic, cold room        | 0,39                                    | 0,38 | 0,38 | 0,39 | 0,40 | 0,37 | 0,34 | 0,12 | 0,16 | 0,16 | 0,19 | 0,18 | 0,13 | 0,11 | 0,19 | 0,26 | 0,34 | 0,26 | 0,28 |
|                                 | anaerobic, room temperature | 0,39                                    | 0,36 | 0,38 | 0,35 | 0,34 | 0,36 | 0,38 | 0,28 | 0,12 | 0,25 | 0,19 | 0,11 | 0,10 | 0,12 | 0,33 | 0,33 | 0,41 | 0,42 | 0,43 |
|                                 | aerobic, cold room          | 0,39                                    | 0,52 | 0,82 | 1,01 | 0,87 | 0,85 | 0,84 | 0,46 | 0,39 | 0,68 | 1,04 | 0,81 | 0,56 | 0,52 | 0,70 | 0,90 | 0,90 | 1,01 | 0,96 |
|                                 | aerobic, room temperature   | 0,39                                    | 0,63 | 0,80 | 0,96 | 1,00 | 1,06 | 1,08 | 0,82 | 0,70 | 0,58 | 0,58 | 0,51 | 0,45 | 0,57 | 0,61 | 0,62 | 0,88 | 1,05 | 1,04 |
| Bobek<br>cones                  | anaerobic, cold room        | 0,32                                    | 0,43 | 0,59 | 0,54 | 0,60 | 0,68 | 0,71 | 0,64 | 0,77 | 0,74 | 0,67 | 0,60 | 0,62 | 0,58 | 0,18 | 0,18 | 0,23 | 0,25 | 0,73 |
|                                 | anaerobic, room temperature | 0,32                                    | 0,42 | 0,59 | 0,63 | 0,62 | 0,71 | 0,63 | 0,77 | 1,24 | 1,50 | 1,37 | 0,91 | 0,89 | 1,01 | 1,11 | 1,15 | 1,46 | 1,40 | 1,39 |
|                                 | aerobic, cold room          | 0,32                                    | 0,71 | 0,73 | 0,69 | 0,97 | 1,09 | 0,92 | 1,32 | 0,72 | 1,20 | 1,14 | 1,06 | 1,20 | 1,37 | 1,46 | 1,66 | 1,98 | 2,43 | 2,12 |
|                                 | aerobic, room temperature   | 0,32                                    | 0,50 | 0,65 | 0,62 | 0,95 | 1,22 | 1,37 | 2,08 | 2,19 | 2,96 | 2,22 | 1,70 | 1,77 | 1,86 | 1,78 | 1,70 | 1,59 | 1,37 | 1,41 |
| Bobek<br>pellets                | anaerobic, cold room        | 0,92                                    | 0,46 | 0,53 | 0,38 | 0,45 | 0,34 | 0,31 | 0,35 | 0,33 | 0,33 | 0,40 | 0,31 | 0,32 | 0,33 | 0,33 | 0,70 | 0,38 | 0,42 | 0,31 |
|                                 | anaerobic, room temperature | 0,92                                    | 0,41 | 0,34 | 0,35 | 0,45 | 0,33 | 0,24 | 0,30 | 0,29 | 0,35 | 0,37 | 0,31 | 0,40 | 0,33 | 0,33 | 0,38 | 0,35 | 0,40 | 0,69 |
|                                 | aerobic, cold room          | 0,92                                    | 0,93 | 1,18 | 1,18 | 1,58 | 1,40 | 1,75 | 1,85 | 2,45 | 1,90 | 2,16 | 2,10 | 2,21 | 1,96 | 2,77 | 2,69 | 3,07 | 2,77 | 3,35 |
|                                 | aerobic, room temperature   | 0,92                                    | 1,00 | 1,19 | 1,67 | 1,89 | 2,26 | 2,94 | 3,82 | 5,12 | 6,24 | 7,69 | 7,93 | 7,62 | 8,27 | 8,48 | 8,65 | 7,06 | 6,88 | 7,06 |
| Styrian Gold<br>cones           | anaerobic, cold room        | 0,30                                    | 0,54 | 0,49 | 0,46 | 0,53 | 0,47 | 0,61 | 0,54 | 0,72 | 0,84 | 1,11 | 0,77 | 1,33 | 0,96 | 1,02 | 1,03 | 1,15 | 1,16 | 0,88 |
|                                 | anaerobic, room temperature | 0,30                                    | 0,53 | 0,54 | 0,49 | 0,61 | 0,57 | 0,94 | 0,74 | 1,03 | 1,67 | 1,86 | 2,00 | 2,20 | 1,42 | 1,26 | 1,24 | 1,53 | 1,62 | 1,38 |
|                                 | aerobic, cold room          | 0,30                                    | 0,56 | 0,61 | 0,55 | 0,63 | 0,51 | 0,73 | 0,61 | 0,92 | 1,11 | 1,19 | 1,01 | 1,94 | 1,33 | 1,82 | 2,36 | 2,13 | 2,36 | 1,65 |
|                                 | aerobic, room temperature   | 0,30                                    | 0,68 | 0,64 | 0,64 | 0,83 | 0,94 | 1,43 | 1,48 | 1,96 | 2,09 | 2,16 | 2,33 | 2,47 | 2,11 | 2,11 | 1,52 | 1,27 | 1,15 | 1,31 |
| Savinjski<br>golding<br>pellets | anaerobic, cold room        | 0,38                                    | 0,60 | 0,53 | 0,49 | 0,51 | 0,58 | 0,42 | 0,46 | 0,38 | 0,52 | 0,68 | 0,66 | 0,52 | 0,59 | 0,64 | 0,60 | 0,88 | 0,79 | 0,68 |
|                                 | anaerobic, room temperature | 0,38                                    | 1,00 | 0,51 | 0,55 | 0,60 | 0,65 | 0,49 | 0,50 | 0,55 | 0,82 | 0,88 | 0,98 | 0,85 | 0,94 | 1,10 | 1,15 | 1,13 | 1,54 | 1,39 |
|                                 | aerobic, cold room          | 0,38                                    | 0,61 | 0,76 | 0,81 | 0,87 | 1,03 | 0,88 | 1,07 | 0,98 | 1,09 | 1,39 | 1,32 | 1,06 | 1,16 | 1,34 | 1,38 | 1,67 | 1,81 | 1,91 |
|                                 | aerobic, room temperature   | 0,38                                    | 1,11 | 0,88 | 0,96 | 0,87 | 1,09 | 1,05 | 1,25 | 1,12 | 1,41 | 2,05 | 1,90 | 2,17 | 2,19 | 2,45 | 2,50 | 3,25 | 4,20 | 4,27 |
| Styrian Wolf<br>cones           | anaerobic, cold room        | 0,28                                    | 0,44 | 0,36 | 0,36 | 0,29 | 0,36 | 0,30 | 0,18 | 0,19 | 0,18 | 0,20 | 0,29 | 0,18 | 0,20 | 0,24 | 0,24 | 0,27 | 0,31 | 0,35 |
|                                 | anaerobic, room temperature | 0,28                                    | 0,68 | 0,34 | 0,36 | 0,33 | 0,43 | 0,34 | 0,19 | 0,20 | 0,27 | 0,47 | 0,35 | 0,22 | 0,23 | 0,32 | 0,32 | 0,43 | 0,55 | 0,50 |
|                                 | aerobic, cold room          | 0,28                                    | 0,56 | 0,47 | 0,49 | 0,49 | 0,54 | 0,58 | 0,42 | 0,44 | 0,31 | 0,85 | 0,83 | 0,47 | 0,47 | 0,48 | 0,56 | 0,77 | 1,02 | 0,69 |
|                                 | aerobic, room temperature   | 0,28                                    | 0,65 | 0,65 | 0,76 | 0,75 | 0,80 | 0,83 | 0,60 | 0,63 | 0,80 | 0,94 | 0,97 | 0,90 | 0,94 | 1,01 | 0,98 | 1,10 | 1,11 | 1,07 |
| Strian Wolf<br>pellets          | anaerobic, cold room        | 0,35                                    | 0,30 | 0,29 | 0,31 | 0,40 | 0,32 | 0,11 | 0,19 | 0,23 | 0,20 | 0,21 | 0,17 | 0,13 | 0,13 | 0,26 | 0,24 | 0,24 | 0,19 | 0,20 |
|                                 | anaerobic, room temperature | 0,35                                    | 0,28 | 0,30 | 0,30 | 0,29 | 0,30 | 0,20 | 0,20 | 0,19 | 0,24 | 0,23 | 0,21 | 0,24 | 0,22 | 0,24 | 0,26 | 0,33 | 0,29 | 0,30 |
|                                 | aerobic, cold room          | 0,35                                    | 0,47 | 0,59 | 0,97 | 1,50 | 1,29 | 0,81 | 0,78 | 1,03 | 1,23 | 1,44 | 1,41 | 1,54 | 1,78 | 1,94 | 2,22 | 2,30 | 2,47 | 2,53 |
|                                 | aerobic, room temperature   | 0,35                                    | 0,98 | 1,28 | 1,52 | 2,18 | 1,94 | 1,13 | 1,07 | 2,06 | 1,90 | 1,47 | 1,31 | 1,96 | 1,89 | 1,41 | 1,45 | 1,84 | 1,75 | 1,84 |



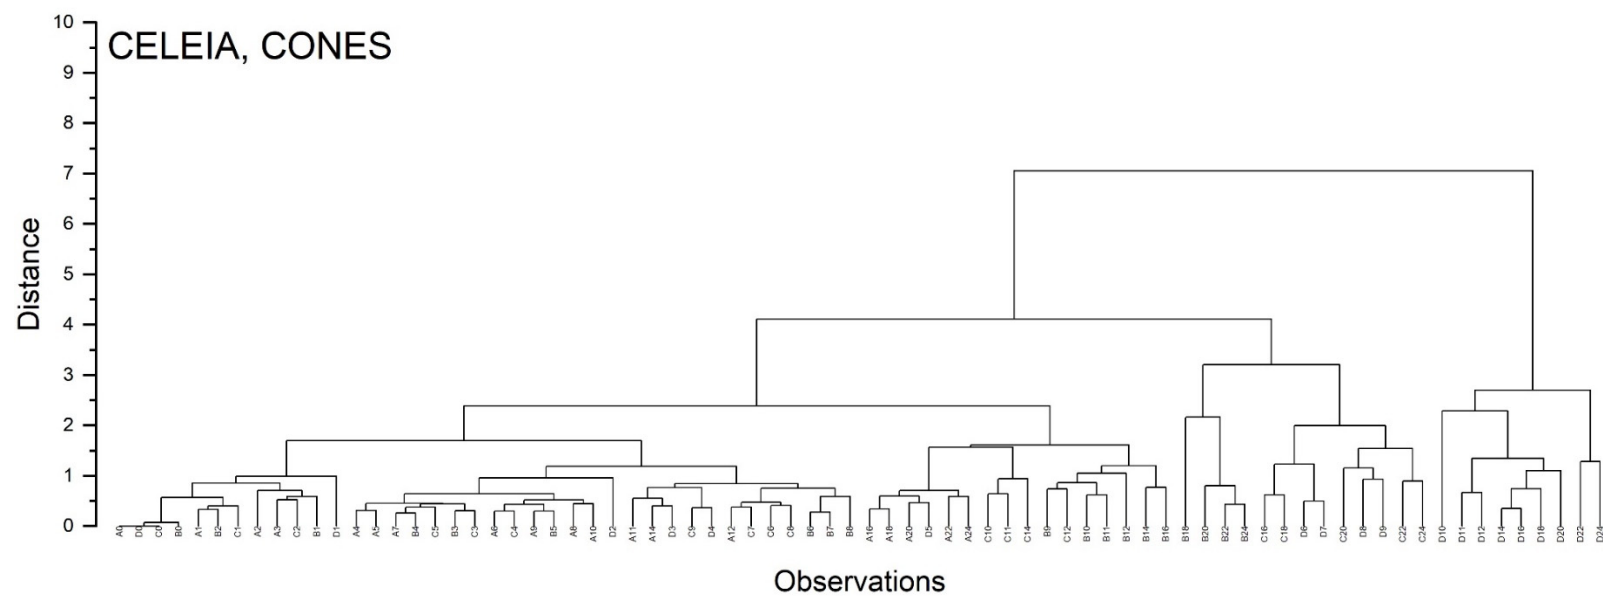

Supplementary figure S1: Dendrogram for cones of *Celeia*.

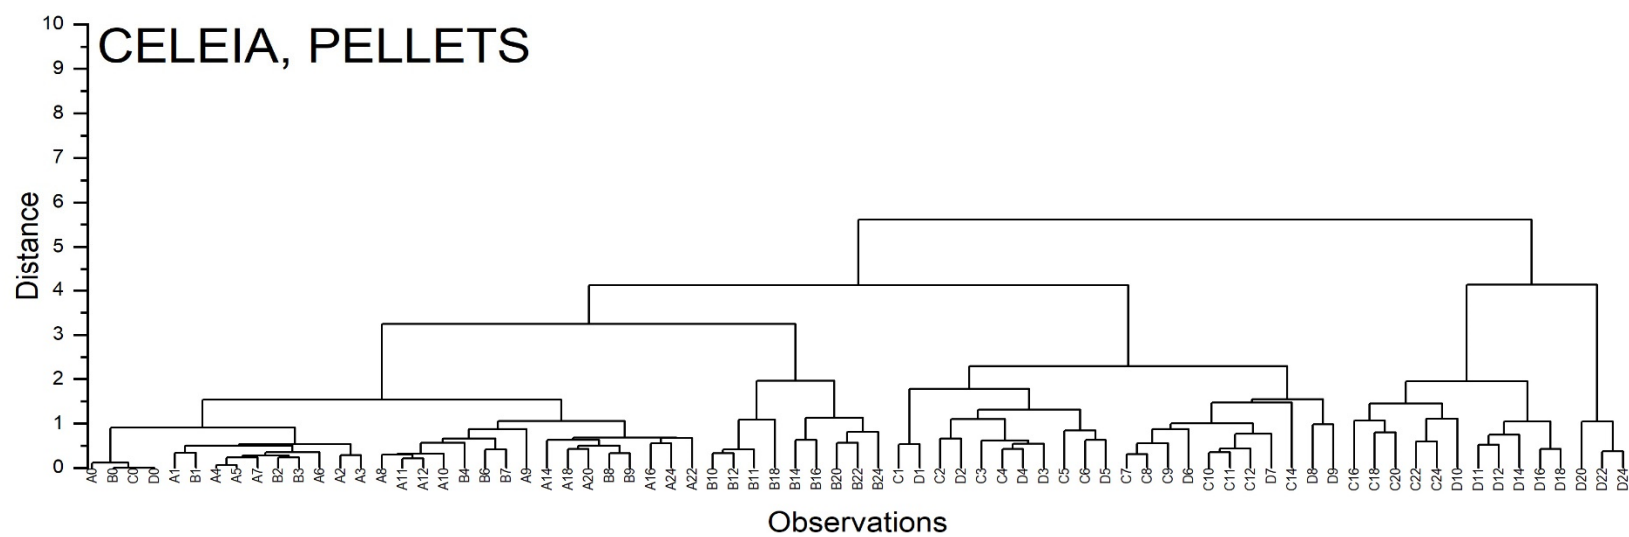

Supplementary figure S2: Dendrogram for pellets of *Celeia*

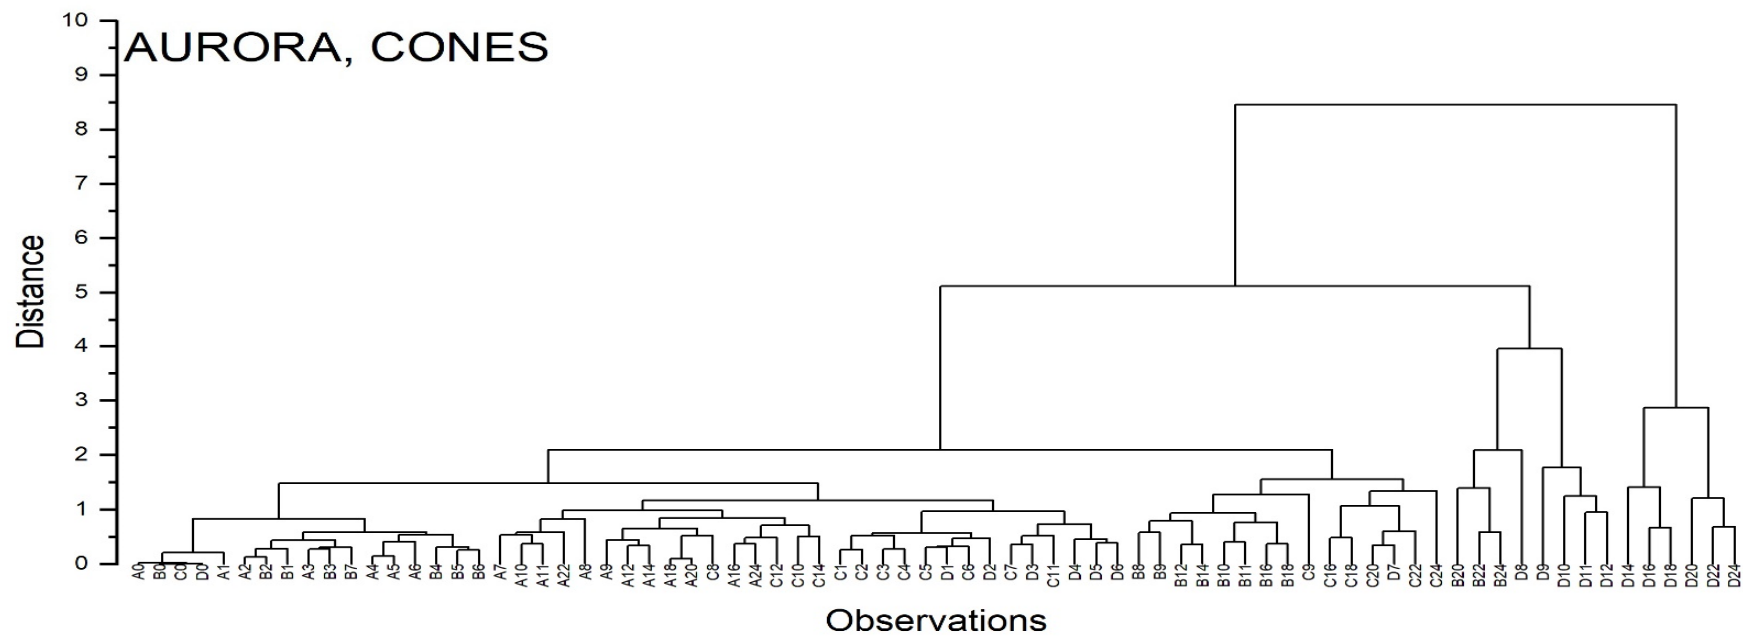

Supplementary figure S3: Dendrogram for cones of Aurora.

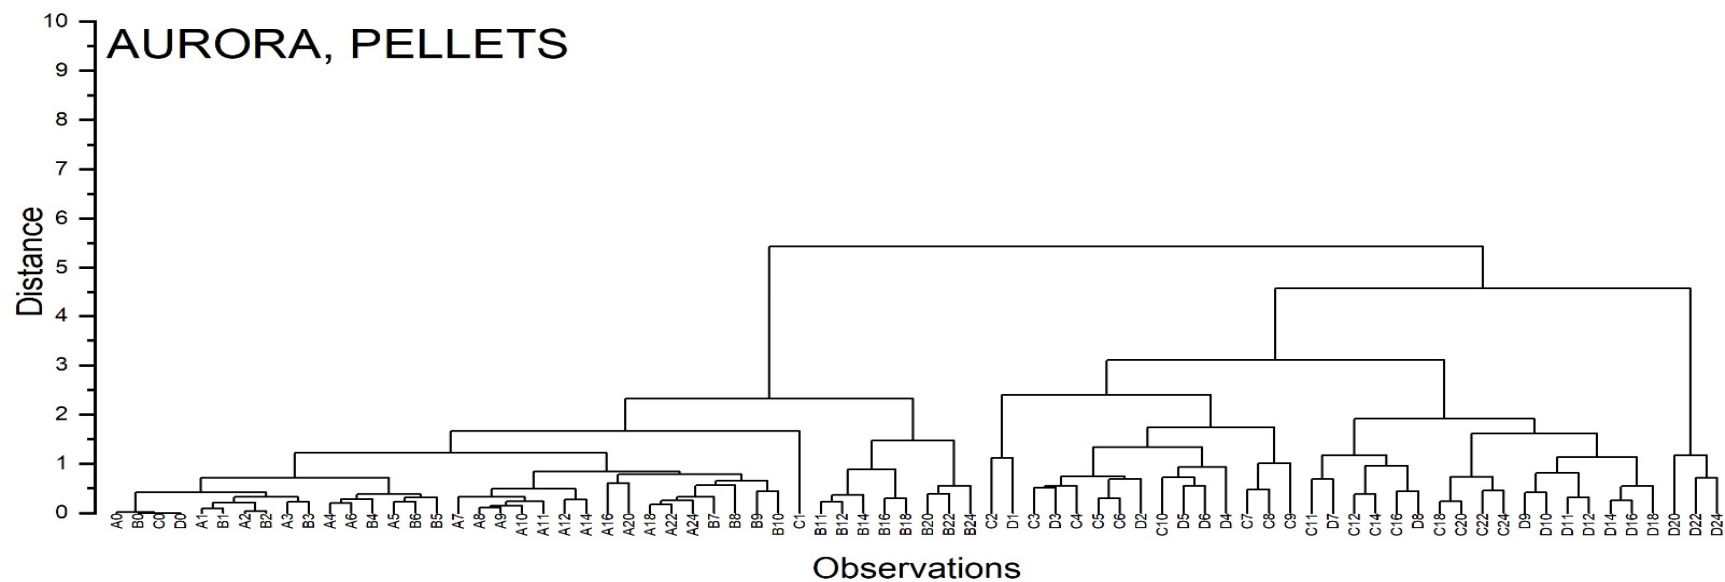

Supplementary figure S4: Dendrogram for pellets of Aurora.

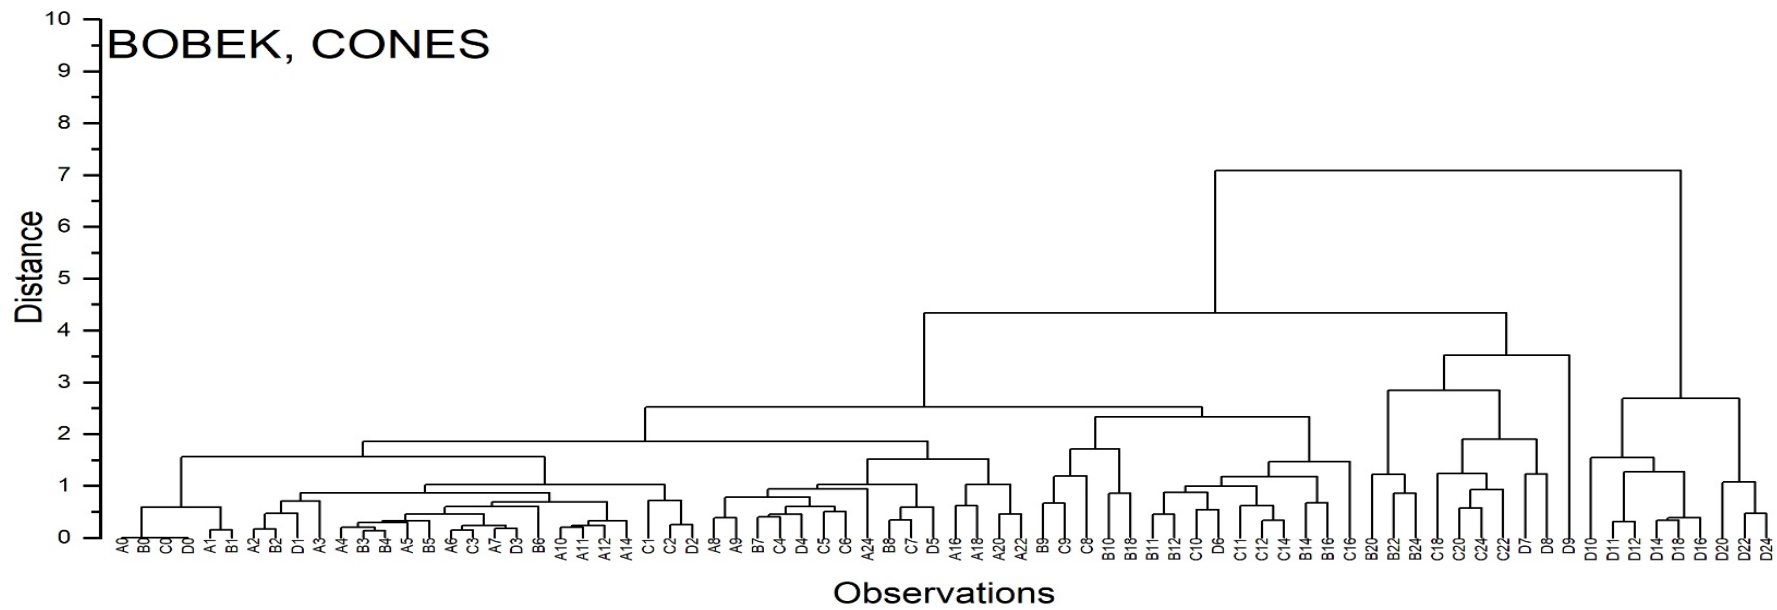

Supplementary figure S5: Dendrogram for cones of Bobek.

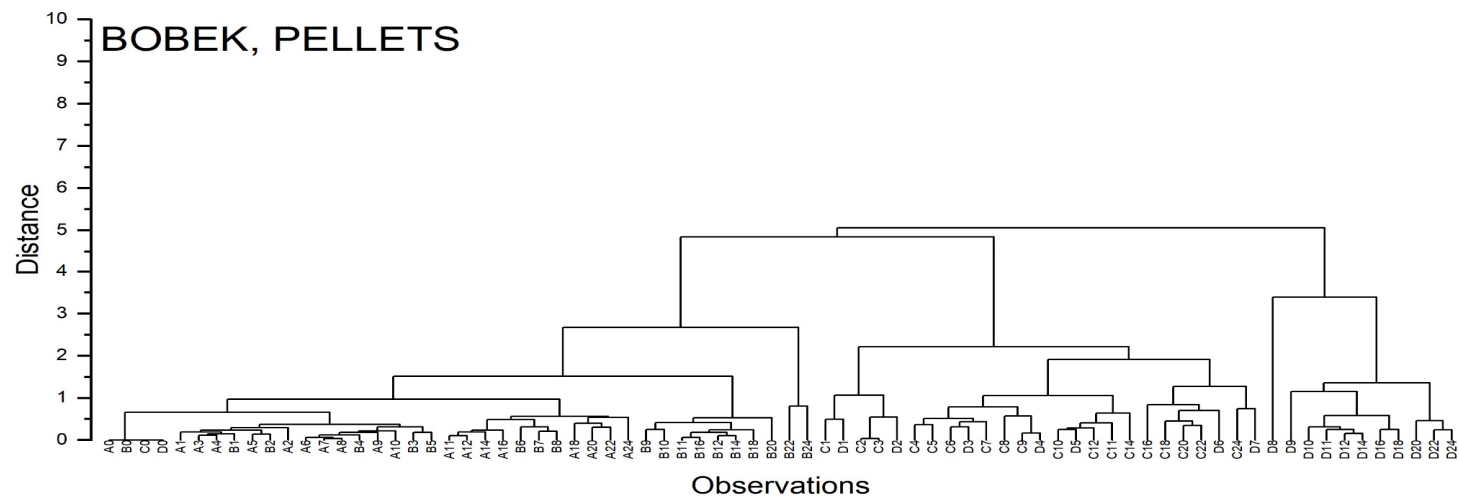

Supplementary figure S6: Dendrogram for pellets of Bobek.

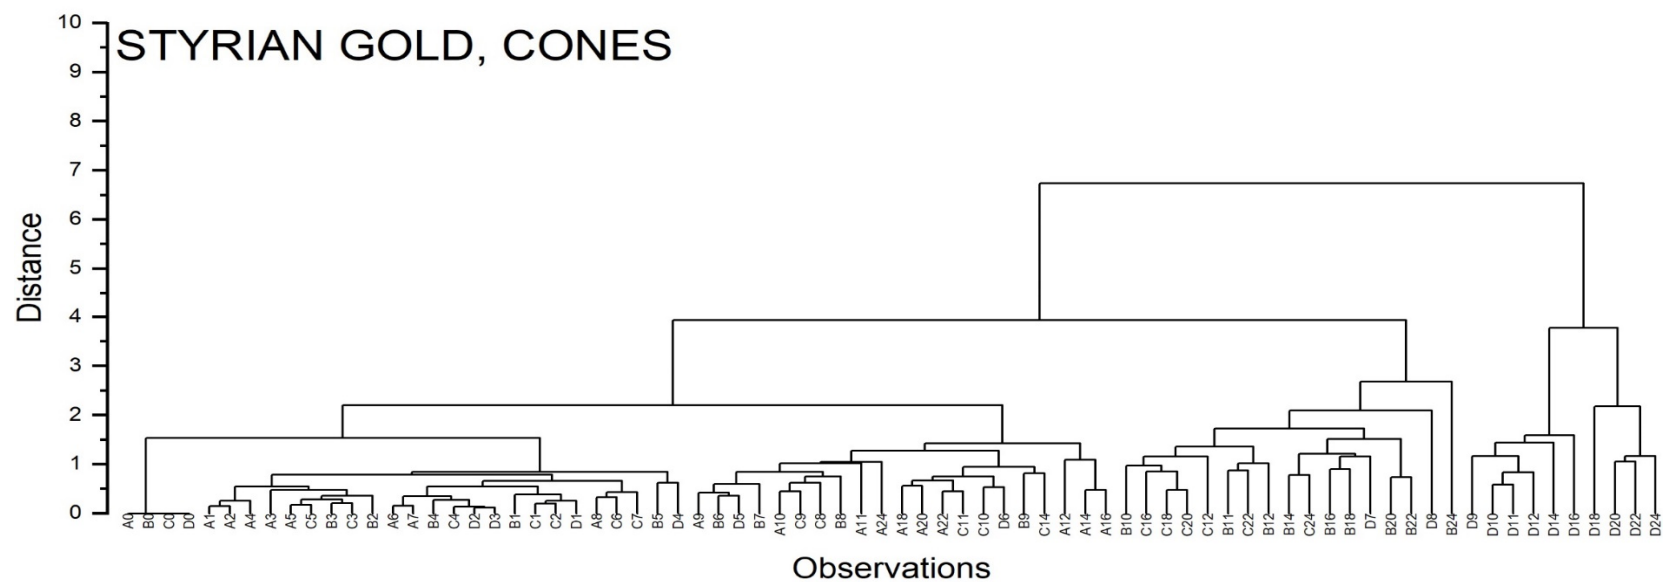

Supplementary figure S7: Dendrogram for cones of Styrian Gold

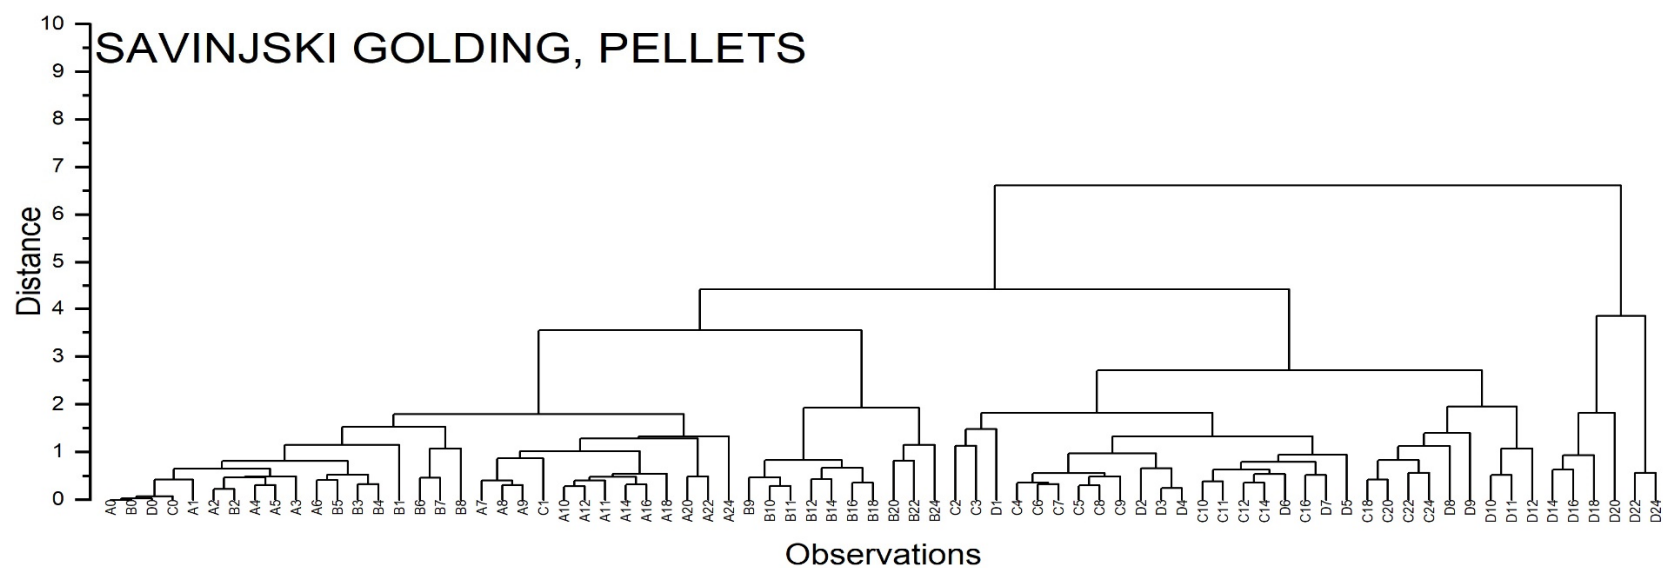

Supplementary figure S8: Dendrogram for pellets of Savinjski Golding.
